27 **Abstract**

28 Patients with disorders of consciousness exhibit severe declines in arousal and awareness,  
29 alongside anomalous functional brain connections and aberrant neuronal activities<sup>1-4</sup>. Yet, the  
30 diagnostic error of patients' consciousness states can reach up to forty percent<sup>5,6</sup>, resulting in a  
31 worse prognosis. Neuronal mechanisms underlying the disorders are indispensable for identifying  
32 objective and intrinsic markers of consciousness. As the principal relay station between the  
33 brainstem arousal nuclei and the cerebral cortex, the thalamus has been empirically inferred to  
34 maintain consciousness and wakefulness within the brain connectome<sup>7-12</sup>. Here, we investigated  
35 thalamic spiking, brain connections, consciousness states, and outcomes following deep brain  
36 stimulation in 29 patients. Our study reveals that thalamic activities can signal their consciousness  
37 states. Patients diagnosed with vegetative state/unresponsive wakefulness syndrome exhibited less  
38 active neurons with longer and more variable burst discharges compared to those in a minimally  
39 conscious state. Furthermore, as a direct deep brain stimulation site, neuronal profiles in the  
40 centromedian/parafascicular complex of the thalamus indicated whether electrostimulation here  
41 improved outcomes. Stronger tonic firing was associated with enhanced thalamocortical  
42 connections and better recovery outcomes in patients. These findings suggest that thalamic spiking  
43 signatures, including single-neuron burst discharge and tonic firing, selectively indicate the  
44 representation and alteration of consciousness. These findings provide direct neuronal and clinical  
45 evidence for understanding of thalamic contributions to disorders of consciousness.

46

## 47 **Main**

48 Thalamus may modulate consciousness through its spiking activity. Thalamic dual firing modes,  
49 tonic and burst, have distinct effects on thalamocortical interactions<sup>13-19</sup>. Their burst modes were  
50 regulated during states of unresponsiveness or unconsciousness. Nonetheless, this knowledge  
51 about neuronal correlates of consciousness, especially at the cellular level, was derived primarily  
52 from comparisons between anesthesia, natural sleep, and wakefulness in animal models (rodents<sup>9</sup>,  
53 cats<sup>7</sup> and monkeys<sup>10</sup>). Comparing data from three patients with disorders of consciousness (DoC),  
54 only a few clinical cases have shown that vegetative state/unresponsive wakefulness syndrome  
55 (VS/UWS) and minimally conscious state (MCS) differ in thalamic spiking activity<sup>20</sup>. The lack of  
56 neurophysiological signatures analysis in DoC patients, particularly at the single-unit level, hinders  
57 our ability to understand the disorders' neuronal mechanisms in greater depth.

58 As the primary hub between the brainstem arousal nuclei and the cerebral cortex, the thalamus  
59 may function as an essential node within the neuronal network responsible for regulating  
60 arousal<sup>1,2,8,21-24</sup>. The mesocircuit hypothesis posits that the recovery of consciousness may be  
61 influenced by frontostriatal connections, with a specific contribution from the thalamus<sup>1,21</sup>. Deep  
62 brain stimulation (DBS) in the thalamus has been demonstrated to improve cognitive and  
63 behavioral functions in DoC patients<sup>1,21,25-30</sup>. A recent study demonstrated that DBS in the central  
64 lateral nucleus can enhance executive function in 5 conscious patients with moderate-to-severe  
65 traumatic brain injury<sup>31</sup>. Thalamic DBS has the potential to modulate thalamocortical and  
66 corticocortical interactions, alter activity in wide-ranging frontoparietal cortices and the cingulate,  
67 and rouse animals from stable anesthesia<sup>10,11,32,33</sup>. Although stimulation targeting specific nodes  
68 and connections could reactivate injured arousal networks and promote the re-emergence of  
69 consciousness, the underlying neuronal mechanisms and neuronal circuits have not yet been fully  
70 elucidated. In addition, clinical evidence indicating that the effects of arousal regulation with DBS  
71 differed among DoC patients<sup>26,34</sup> speaks for a personalized prognosis<sup>35</sup>. Further research is  
72 required to comprehend intrinsic neuronal activities and how they contribute to DoC symptoms  
73 and outcomes following DBS, particularly through direct clinical evidence on single neurons and  
74 functional connections in DoC patients.

75 Here, we conducted a retrospective investigation into the neuronal mechanisms underlying the  
76 representation and alteration of consciousness in 29 patients diagnosed with DoC. We employed  
77 multi-model measurements utilized in clinical treatments. Specifically, we analyzed thalamic  
78 spiking activity collected as patients recovered from anesthesia during neurosurgery. We  
79 statistically evaluated relationships between the spiking activity of thalamic neurons, preoperative  
80 resting-state functional magnetic resonance imaging (rs-fMRI) data, and clinical neurobehavioral  
81 assessments before and after DBS within a 12-month period (Extended Data Fig. 1a).

82

## 83 **Results**

### 84 **Neuronal signatures of thalamic neurons indicate DoC patients' consciousness levels**

85 We first describe thalamic microelectrode recordings. All recorded single units were offline sorted  
86 and remapped according to reconstructed DBS lead trajectories (Fig. 1a, bilateral leads from  
87 patient No.26 as an example; Extended Data Fig. 1c, leads for all 29 patients). As depicted in Fig.  
88 1b, the lead has traversed the ventral lateral nucleus (VL), and the central lateral nucleus (CL)  
89 before landing its C0 contact into the centromedian/parafascicular complex (CM/Pf) of the  
90 thalamus. Neuronal activities were recorded from a total of 682 thalamic sites in 29 patients for  
91 subsequent analyses (Fig. 1c).

92 The electrophysiological signatures of single units and multi units in the three thalamic nuclei were  
93 investigated (Figs. 1d,e). For *a single neuron*, we analyzed the single-unit frequency (SUF) and  
94 the geometric coefficient of variation (GCV) of its inter-spike interval (ISI). 94.49% of recorded  
95 thalamic neurons exhibit both tonic and burst firing modes (Fig. 1f). A burst event was identified  
96 by clusters of at least two spikes with ISIs shorter than 8 milliseconds. We categorized spikes and  
97 calculated their firing rates of burst spikes (BS) and tonic spikes (TS) based on whether or not they  
98 were in burst mode. The burst event frequency (BEF, burst events per second), the burst length  
99 (BL, spike numbers per burst), and its coefficient of variation (BL-CV) were also calculated. For  
100 *multiple neurons*, we computed the multi-unit frequency (MUF), the sample entropy (SpEn), and  
101 the unit number (UN) at each recording site. Here, ten spike-based neuronal signatures were  
102 extracted from DoC patients to characterize a panoramic view of neuronal spiking activity in the  
103 thalamus.

104 We employed the JFK Coma Recovery Scale-Revised (CRS-R)<sup>36</sup>, a validated neurobehavioral  
105 assessment designed to characterize and monitor patients' consciousness states (see Extended Data  
106 Table 1 for details). To capture the relationship between neuronal activities in the thalamus and  
107 consciousness levels, we grouped patients according to their preoperative states of consciousness:  
108 VS/UWS (n = 17 patients) and MCS (n = 12 patients) (Fig. 2a). To evaluate neuronal signatures  
109 for both single units and multiple units at each recording site without bias towards specific types  
110 of thalamic neurons, we performed analyses on the mean responses across neurons when multiple  
111 neurons were recorded at that site. Further, we independently compared 10 neuronal signatures in  
112 the thalamic nuclei, VL, CL, and CM/Pf (Fig. 2b), and identified neuronal signatures exhibited  
113 differences between the two states of consciousness (Fig. 2c). Patients in VS/UWS with a lower  
114 level of consciousness exhibited less active thalamic neurons, characterized by longer and more  
115 variable burst discharges in the CM/Pf, and lower burst firing activities in the CL and VL (Figs.  
116 2b,c), compared to those in MCS. These signatures in thalamic nuclei, including burst discharges  
117 of single neurons, effectively distinguish VS/UWS from MCS.

118 To synthesize these signatures, we incorporated them as predictor variables in a partial least  
119 squares regression (PLS) model by applying the mean responses across neurons (see Methods for

120 details). Based on the regression results (Extended Data Fig. 2a), we defined a neuronal index  
121 which can differentiate between patients' consciousness states (Fig. 2d,  $P < 0.001$ , Mann-Whitney-  
122 Wilcoxon test). Further, the indices of three thalamic nuclei exhibit consistent trends of upward  
123 slopes as a function of patients' total CRS-R scores (CRS-R<sub>T0</sub>, Figs. 2e-g). CRS-R scores were  
124 lower when indices were smaller and became progressively higher as indices grew larger. The  
125 neuronal index of the thalamus can differentiate MCS from VS/UWS and correlate with  
126 consciousness levels. Clinical factors, such as the interval injury to DBS surgery, as well as the  
127 etiology, could impact neuronal activities and are likely to play a major role in the manifestation  
128 of neuronal indices. It is noteworthy that the neuronal indices of thalamic nuclei consistently grade  
129 patients' consciousness levels, employing a linear regression analysis to control for the effects of  
130 interval injury and etiology (Extended Data Figs. 2b,c).

### 131 **Thalamic spiking indicates arousal regulations following DBS in DoC patients**

132 After a 7-day recovery from surgery, the thalamic DBS was delivered through the C0 contact of  
133 electrodes centered in the CM/Pf (Extended Data Fig. 1). As the direct treatment site, we examined  
134 whether neuronal signatures of the CM/Pf signal outcomes following DBS. We assessed patients'  
135 recovery outcomes within 12 months using Glasgow Outcome Scales (GOS) and monitored their  
136 follow-up consciousness states by CRS-R scores (CRS-R<sub>T12</sub>). Ten patients recovered  
137 consciousness (CR, GOS  $\geq 3$ ). Their follow-up total CRS-R scores increased from  $9 \pm 3$  (Mean  $\pm$   
138 S.D., CRS-R<sub>T0</sub>) to  $18 \pm 4$  (CRS-R<sub>T12</sub>). The remaining 19 patients did not recover consciousness  
139 (CNR, GOS  $\leq 2$ ); their total CRS-R scores evolved from  $6 \pm 2$  (CRS-R<sub>T0</sub>) to  $7 \pm 2$  (CRS-R<sub>T12</sub>).  
140 Neuronal activities of the CM/Pf in the CR patients revealed higher tonic firing rates and variations  
141 of ISI in single units, as well as more active neurons with higher spiking activities in multi-unit  
142 analyses (Figs. 3a-f, Mann-Whitney-Wilcoxon test, TS:  $P = 1.55 \times 10^{-4}$ ; GCV:  $P = 8.63 \times 10^{-5}$ ;  
143 SUF:  $P = 5.56 \times 10^{-3}$ ; MUF:  $P = 9.18 \times 10^{-4}$ ; SpEn:  $P = 1.53 \times 10^{-2}$ ; UN:  $P = 6.47 \times 10^{-3}$ ).

144 We identify how these six neuronal signatures in the CM/Pf contribute to discriminate the recovery  
145 group from the non-recovery group by using a cross-validated supervised machine learning model  
146 (Fig. 3g, see Methods for details). The model indicates that five of them (except SUF) can  
147 sensitively signal recovery outcomes (CR vs. CNR) in 29 patients following DBS (defined by F-  
148 score, ANOVA). Prior to DBS, the average consciousness level in group CR (8 patients in MCS  
149 and 2 patients in VS/UWS) was notably higher than that of group CNR (4 patients in MCS and 15  
150 patients in VS/UWS), potentially leading to varied recovery outcomes. Thus, these five thalamic  
151 signatures identified here might only serve as biomarkers to represent consciousness levels, rather  
152 than playing roles in arousal regulation or predicting outcomes. We ruled out this possibility by  
153 employing a linear regression analysis to control the effect of CR and CNR patients' preoperative  
154 consciousness states. The residual results after regression revealed that the single-unit spiking  
155 activity could indicate recovery outcomes following DBS, including the single-unit tonic firing,  
156 and its ISI variation (Fig. 3h, Mann-Whitney-Wilcoxon test, TS:  $P = 1.42 \times 10^{-3}$ ; GCV:  $P = 3.27$   
157  $\times 10^{-3}$ ).

158 In order to evaluate whether the neurons analyzed here were directly modulated by DBS, we  
159 simulated the DBS volume of tissue activated (VTA) in three thalamic nuclei and calculated their  
160 activation ratios by dividing the VTA by the total volume of that nucleus (Fig. 3i). Figure 3j depicts  
161 that 24.0% of the CM/Pf, 0.7% of the CL, and 0.3% of the VL could be activated by DBS in 29  
162 patients. The existence of VTAs in the CL and the VL raised the possibility that DBS-activated  
163 neurons in these two nuclei could also aid in recovery following DBS. Comparing the recovery  
164 outcomes of patients with more than 1% or 2% activation ratios in the CL and the VL versus those  
165 without, our data failed to support this possibility. Neither GOS scores (1%: CL,  $P = 0.54$ , VL,  $P$   
166  $= 0.82$ ; 2%: CL,  $P = 0.83$ ) nor changes of total CRS-R scores following DBS (1%: CL,  $P = 0.37$ ,  
167 VL,  $P = 1.00$ ; 2%: CL,  $P = 0.74$ ) permitted to differentiate both groups. Thus, we focused on the  
168 CM/Pf's neurons located in the VTA regions of CR and CNR groups. The data showed that there  
169 was higher single-unit tonic firing (TS, Fig. 3k), as well as higher variation of ISI (GCV, Fig. 3l)  
170 in the CR group. Note that, as prospective prognostic indicators, TS and GCV of single units in  
171 the CM/Pf did not permit to differentiate consciousness levels (Fig. 2c). These findings suggest  
172 that neuronal mechanisms for altering the levels of consciousness may be distinct from neuronal  
173 signatures involved in representing the states of consciousness.

#### 174 **Thalamic neuronal signatures linked with thalamocortical connections to predict recovery** 175 **outcomes**

176 The thalamus assumes the responsibility of regulating arousal through its connections within the  
177 neuronal network, which include the cerebral cortex and striatum. We examined a subgroup of 17  
178 patients who obtained qualified rs-fMRI data and conducted three independent additional analyses  
179 to reveal the relationships between thalamic signatures, brain connections and DBS outcomes (Fig.  
180 4a).

181 Initially, the relationship between effective connectivity (EC) and recovery outcomes were  
182 examined. We utilized Dynamic Casual Modeling (Fig. 4b and Extended Data Figs. 3a-f) to  
183 investigate the thirty connections between the CM/Pf and 15 cortical areas from 6 functional brain  
184 networks, namely the default mode network, the executive control network, the salience network,  
185 the sensorimotor network, the auditory network, and the visual network, as well as two connections  
186 between the CM/Pf and the striatum (Extended Data Fig. 3g). The subsequent examination aimed  
187 to investigate the correlation between neuronal signatures in the CM/Pf and recovery outcomes.  
188 Upon reevaluating the neuronal signatures in these 17 patients with qualified rs-fMRI data, the  
189 findings consistently demonstrated that both TS and GCV in the CM/Pf were correlated with GOS  
190 scores (Fig. 4c,d). Lastly, we investigated how neuronal signatures of the CM/Pf influence brain  
191 connections, by utilizing the Parametric Empirical Bayes analyses on neuronal signatures and  
192 effective connectivity (Fig. 4e).

193 The three pairwise correlation analyses discovered 6 ECs that formed “logic loops”. These loops  
194 establish logic linkages between ECs, neuronal signatures, and GOS scores in a closed manner



195 (Extended Data Figs. 4a,b). Intriguingly, these ECs comprised the anterior medial prefrontal cortex  
196 (aMPFC), superior parietal cortex (SPC), dorsal anterior cingulate cortex (dACC), primary  
197 auditory cortex (A1) and anterior prefrontal cortex (PFC). Most are crucial nodes in consciousness  
198 and wakefulness-related thalamoparietal and thalamofrontal connections. In contrast, the  
199 connections between the CM/Pf and the striatum failed to yield any statistically significant  
200 differences between the CR and CNR groups (Mann-Whitney-Wilcoxon test;  $EC_{CM/Pf\text{-Striatum}}$ :  $P =$   
201  $0.19$ ;  $EC_{Striatum\text{-CM/Pf}}$ :  $P = 0.28$ ). The extensive thalamostriatal connections in both CR and CNR  
202 patients might have potentially prevented accurate predictions of recovery.

203 To further verify the impact of these brain connections on recovery outcomes, we utilized the  
204 cross-validated supervised machine learning model with a feature selection. The analysis has  
205 evaluated the most important connection that effectively differentiates the CR group and the CNR  
206 group (Fig. 4e): the EC from CM/Pf to aMPFC in the default mode network ( $EC_{CM/Pf\text{-aMPFC}}$ ).  
207 Within the logic loops in Figure 4f, higher neuronal tonic firing rates and variations of ISI in the  
208 CM/Pf are correlated with better recovery outcomes with higher GOS scores and the strengthened  
209  $EC_{CM/Pf\text{-aMPFC}}$ . To summarize these effects, we utilized a logistic regression classification to predict  
210 DBS outcomes. Results from the model demonstrate that the top selected factors, including TS,  
211 GCV, and  $EC_{CM/Pf\text{-aMPFC}}$  of individual patient, effectively discriminate the CR group from the CNR  
212 group, achieving an AUC of 0.84 (Fig. 4g). These relationships embedded in a logic linkage  
213 indicate that neuronal signatures (TS and GCV) in the CM/Pf could impact recovery by modulating  
214 the effective connectivity ( $EC_{CM/Pf\text{-aMPFC}}$ ). It suggests that the CM/Pf, as a location for DBS, may  
215 be an origin of effects on regulating arousal in neuronal networks.

## 216 Discussion

217 In this study, we have been able to evaluate cellular events that occur in the thalamic nuclei of  
218 patients diagnosed with VS/UWS and MCS, at both single neuron and multiple neuron levels. Our  
219 results demonstrated effects of thalamic spiking activity on consciousness levels in patients with  
220 DoC. In patients with a higher consciousness level, larger spiking activities, more active neurons,  
221 and more asynchronous firing patterns (higher SpEn) in the thalamus could generate stronger  
222 neuronal outputs and more flexible connections. These effects were consistent with previous  
223 research on neuronal activities in the healthy brain when animals woke from anesthesia and  
224 sleep<sup>7,10,37</sup>. In addition, our data revealed that the burst discharge of single neurons was an essential  
225 signature for the representation of consciousness in DoC patients. Patients in a VS/UWS who  
226 experience a lower level of consciousness demonstrated longer and more variable burst discharges  
227 in the CM/Pf compared to those with a higher consciousness in a MCS. Previous research  
228 demonstrated that shorter burst lengths are indicative of a stronger  $\gamma$ -aminobutyric acid-ergic  
229 (GABAergic) inhibition in the system, as the burst length can be shortened by injecting GABA  
230 into striate cortex and prolonged by applying GABA<sub>A</sub> receptor blocker bicuculline<sup>38</sup>. DoC patients  
231 with traumatic brain injury showed broad reductions in GABA<sub>A</sub> receptor availability  
232 predominantly in the frontal lobes, striatum, and thalamus<sup>39</sup>, which could result in longer burst

233 lengths. Neuronal burst discharges in the cortex and subcortex may share common mechanisms  
234 for consciousness-related processing. By combining these effects, our PLS regressions on thalamic  
235 signatures defined an index for assessing consciousness levels in DoC patients. Intriguingly,  
236 neuronal indices of thalamic nuclei can sensitively grade distinct levels of consciousness, ranging  
237 from VS/UWS to MCS.

238 Recent neuroimaging studies have unveiled intricate functional alterations within widespread brain  
239 networks of DoC patients. One of the prominent findings is the disrupted default mode network  
240 (DMN), which comprises brain regions implicated in introspection, self-referential processing, and  
241 mind wandering<sup>40-47</sup>. Consistent reports indicate reduced connectivity within the DMN and altered  
242 interactions with other brain networks in DoC, suggesting a breakdown in intrinsic brain activity  
243 and consciousness mechanisms<sup>4,48-55</sup>. As a key node of the DMN, the aMPFC had specific role in  
244 cognitive functions<sup>56</sup>. Research indicates that both the connection features of the aMPFC and its  
245 functional connectivity with the dorsomedial prefrontal cortex correlate with patients' total CRS-  
246 R scores, offering potential as predictors of recovery outcomes<sup>57</sup>. Studies further reveal variations  
247 in functional connections involving the aMPFC across different sleep states<sup>58</sup> and attenuation  
248 under sedation<sup>59</sup>, shedding light on its role in consciousness. Additionally, impaired  
249 thalamocortical connection emerges as another relevant finding in DoC patients. The anterior  
250 forebrain mesocircuit underscored the essential roles of thalamus in consciousness alterations<sup>1</sup>,  
251 through extensive connections with the frontal and parietal cortex (<sup>8,60-65</sup>, our data in Extended  
252 Data Figs. 3h,i). Our results revealed that the connections between the CM/Pf of the thalamus and  
253 the cortex correlate with recovery outcomes following DBS (Extended Data Fig. 4). Previous  
254 research on anesthetized animals showed that DBS in the CM/Pf can effectively affect cortical  
255 networks. CM-DBS<sup>11</sup> and CM/Pf-DBS<sup>32</sup> modulated the activity in various brain regions, including  
256 the prefrontal, parietal, cingulate, temporal, and occipital cortices, as well as the striatum.  
257 Furthermore, DBS restored the collapsed principle gradient of functional connectivity and the  
258 reduced network hierarchical integration induced by anaesthesia<sup>33</sup>. This resulted in arousal-related  
259 functional responses in non-human primates. Significant sensorimotor-associative and limbic-  
260 associative BOLD effects were produced by CM- and Pf-DBS, respectively<sup>66</sup>. Our study  
261 demonstrated that there were bidirectional brain connections inside logic loops linking to recovery  
262 outcomes following DBS: ECs from the CM/Pf to the cortex (Extended Data Fig. 4a), and ECs  
263 from the cortex to the CM/Pf (Extended Data Fig. 4b). When comparing the neuronal signatures  
264 of TS and GCV, we observed that tonic firing only impacted the unidirectional connection from  
265 the CM/Pf to the cortex, rather than the opposite direction (Extended Data Fig. 4c). These findings  
266 hold essential implications for understanding the organization of neuronal mechanisms underlying  
267 thalamic DBS in regulating arousal. As a direct DBS site, neuronal signatures of TS and GCV in  
268 the CM/Pf, as well as ECs between the CM/Pf and the cortex exhibit correlations with GOS scores,  
269 suggesting their potential in predicting recovery outcomes. Therefore, based on the effect on  
270 unidirectional connections, higher tonic firing in the thalamus may be amenable to DBS  
271 modulation through modulating the connection from the CM/Pf to the cortex, especially EC<sub>CM/Pf-</sub>  
272 aMPFC (Fig. 4).



273 It is the context of thalamic firing we demonstrate that is most noteworthy. Signatures of single  
274 units in the CM/Pf associated with recovery outcomes are distinct from those grading  
275 consciousness levels. We have thoroughly analyzed dual modes of thalamic neurons: burst and  
276 tonic discharges. Burst events are crucial for discriminating VS/UWS patients from MCS patients,  
277 whereas tonic discharges transmit effective signals for altering consciousness levels following  
278 DBS. Rapid switching of thalamic firing modes (burst or tonic) in mice can govern the transition  
279 of sleep-wake states<sup>9</sup> or the generalization of epilepsy<sup>67</sup> in a bidirectional manner: burst firing  
280 triggered slow-wave-like activity or initiated absence epilepsy, whereas tonic activation promoted  
281 sleep recovery or terminated the symptom. Thalamus could be the key center for the representation  
282 and alteration of consciousness, but via distinct neuronal mechanisms. The burst and tonic  
283 discharge of thalamic neurons appear to play crucial roles for each of them.

284 A growing body of research indicates that the CL could play a crucial role in arousal  
285 regulation<sup>8,10,68</sup>. CL-DBS could alter consciousness by enhancing interactions in the frontal eye  
286 field and the lateral intraparietal area<sup>10</sup>. We have evaluated the CL's potential contribution to DBS  
287 effects in these patients. Five neuronal signatures of the CL showed differences between the CR  
288 and CNR groups (Extended Data Figs. 5a-e, Mann-Whitney-Wilcoxon test,  $P < 0.05$ ). By utilizing  
289 a linear regression analysis to control patients' preoperative consciousness states, our data verified  
290 that only the GCV in the CL could be consistently selected to discriminate the CR patients from  
291 the CNR group in our dataset (Extended Data Fig. 5f). The thalamocortical connections of EC<sub>CL</sub>-  
292 <sub>ains</sub> and EC<sub>CL</sub>-aMPFC were identified as the most effective features to discriminate the CR and CNR  
293 groups (Extended Data Fig. 5g). Nevertheless, the GCV of CL failed to be significantly related to  
294 neither brain connections nor GOS scores (Extended Data Fig. 5h), which cannot support the logic  
295 loops (Extended Data Figs. 5i,j). Possible reasons could include the presence of a limited number  
296 of recording sites in the CL along the microelectrode punctures and a scarcity of electrically  
297 activated volumes in the CL (Fig. 3g) by DBS in these patients.

298 The question of how the thalamus modulates consciousness is answered in the most detail for the  
299 representation of consciousness and effects on arousal regulation using DBS in a group of 29  
300 patients with DoC. We anticipate that these details may pave the way for the development of  
301 targeted interventions and prognostication strategies for affected individuals. As a potential  
302 predictor of DBS outcomes, stronger thalamic tonic firing could be considered as one of important  
303 factors to be evoked when devising stimulation parameters for therapeutic interventions. In the  
304 meantime, it is almost certain that the thalamic principles of consciousness will apply to other  
305 brain diseases. Perhaps epilepsy, Parkinson's disease, and their DBS outcomes could also be  
306 signaled by thalamic spiking activity and thalamocortical connections.  
307

## 308 **References**

- 309
- 310 1 Edlow, B. L., Claassen, J., Schiff, N. D. & Greer, D. M. Recovery from disorders of  
311 consciousness: mechanisms, prognosis and emerging therapies. *Nat Rev Neurol* **17**, 135-  
312 156, doi:10.1038/s41582-020-00428-x (2021).
- 313 2 Giacino, J. T., Fins, J. J., Laureys, S. & Schiff, N. D. Disorders of consciousness after  
314 acquired brain injury: the state of the science. *Nat Rev Neurol* **10**, 99-114,  
315 doi:10.1038/nrneurol.2013.279 (2014).
- 316 3 Koch, C., Massimini, M., Boly, M. & Tononi, G. Neural correlates of consciousness:  
317 progress and problems (vol 17, pg 307, 2016). *Nature Reviews Neuroscience* **17**, 395-395,  
318 doi:10.1038/nrn.2016.61 (2016).
- 319 4 Northoff, G. & Heiss, W. D. Why Is the Distinction Between Neural Predispositions,  
320 Prerequisites, and Correlates of the Level of Consciousness Clinically Relevant?  
321 Functional Brain Imaging in Coma and Vegetative State. *Stroke* **46**, 1147-1151,  
322 doi:10.1161/Strokeaha.114.007969 (2015).
- 323 5 Schnakers, C. *et al.* Diagnostic accuracy of the vegetative and minimally conscious state:  
324 clinical consensus versus standardized neurobehavioral assessment. *BMC Neurol* **9**, 35,  
325 doi:10.1186/1471-2377-9-35 (2009).
- 326 6 Stender, J., Gosseries, O. & Bruno, M. A. Diagnostic precision of PET imaging and  
327 functional MRI in disorders of consciousness: a clinical validation study (vol 384, pg 514,  
328 2014). *Lancet* **384**, 494-494, doi:10.1016/S0140-6736(14)60042-8 (2014).
- 329 7 Glenn, L. L. & Steriade, M. Discharge rate and excitability of cortically projecting  
330 intralaminar thalamic neurons during waking and sleep states. *J Neurosci* **2**, 1387-1404,  
331 doi:10.1523/JNEUROSCI.02-10-01387.1982 (1982).
- 332 8 Schiff, N. D. Central thalamic contributions to arousal regulation and neurological  
333 disorders of consciousness. *Ann NY Acad Sci* **1129**, 105-118, doi:10.1196/annals.1417.029  
334 (2008).
- 335 9 Gent, T. C., Bandarabadi, M., Herrera, C. G. & Adamantidis, A. R. Thalamic dual control  
336 of sleep and wakefulness. *Nature neuroscience* **21**, 974-984, doi:10.1038/s41593-018-  
337 0164-7 (2018).
- 338 10 Redinbaugh, M. J. *et al.* Thalamus Modulates Consciousness via Layer-Specific Control  
339 of Cortex. *Neuron* **106**, 66-75 e12, doi:10.1016/j.neuron.2020.01.005 (2020).
- 340 11 Tasserie, J. *et al.* Deep brain stimulation of the thalamus restores signatures of  
341 consciousness in a nonhuman primate model. *Sci Adv* **8**, eabl5547,  
342 doi:10.1126/sciadv.abl5547 (2022).
- 343 12 Laureys, S. *et al.* Restoration of thalamocortical connectivity after recovery from persistent  
344 vegetative state. *Lancet* **355**, 1790-1791, doi:Doi 10.1016/S0140-6736(00)02271-6 (2000).
- 345 13 Sherman, S. M. Tonic and burst firing: dual modes of thalamocortical relay. *Trends*  
346 *Neurosci* **24**, 122-126, doi:10.1016/s0166-2236(00)01714-8 (2001).
- 347 14 Swadlow, H. A. & Gusev, A. G. The impact of 'bursting' thalamic impulses at a neocortical  
348 synapse. *Nat Neurosci* **4**, 402-408, doi:10.1038/86054 (2001).
- 349 15 Borden, P. Y. *et al.* Thalamic bursting and the role of timing and synchrony in  
350 thalamocortical signaling in the awake mouse. *Neuron* **110**, 2836-2853. e2838,  
351 doi:10.1016/j.neuron.2022.06.008 (2022).
- 352 16 Saalman, Y. B. & Kastner, S. Cognitive and perceptual functions of the visual thalamus.  
353 *Neuron* **71**, 209-223, doi:10.1016/j.neuron.2011.06.027 (2011).

- 354 17 Usrey, W. M. The role of spike timing for thalamocortical processing. *Current opinion in*  
355 *neurobiology* **12**, 411-417, doi:10.1016/S0959-4388(02)00339-2 (2002).
- 356 18 Sherman, S. M. & Guillery, R. The role of the thalamus in the flow of information to the  
357 cortex. *Philosophical Transactions of the Royal Society of London. Series B: Biological*  
358 *Sciences* **357**, 1695-1708, doi:10.1098/rstb.2002.1161 (2002).
- 359 19 Krahe, R. & Gabbiani, F. Burst firing in sensory systems. *Nature Reviews Neuroscience* **5**,  
360 13-23, doi:10.1038/nrn1296 (2004).
- 361 20 Magrassi, L. *et al.* Single unit activities recorded in the thalamus and the overlying parietal  
362 cortex of subjects affected by disorders of consciousness. *PLoS One* **13**, e0205967,  
363 doi:10.1371/journal.pone.0205967 (2018).
- 364 21 Schiff, N. D. Recovery of consciousness after brain injury: a mesocircuit hypothesis.  
365 *Trends Neurosci* **33**, 1-9, doi:10.1016/j.tins.2009.11.002 (2010).
- 366 22 Martin, R. A., Cukiert, A. & Blumenfeld, H. Short-term changes in cortical physiological  
367 arousal measured by electroencephalography during thalamic centromedian deep brain  
368 stimulation. *Epilepsia* **62**, 2604-2614, doi:10.1111/epi.17042 (2021).
- 369 23 Xu, J. *et al.* Thalamic Stimulation Improves Postictal Cortical Arousal and Behavior. *J*  
370 *Neurosci* **40**, 7343-7354, doi:10.1523/JNEUROSCI.1370-20.2020 (2020).
- 371 24 Monti, M. M. *et al.* Thalamo-frontal connectivity mediates top-down cognitive functions  
372 in disorders of consciousness. *Neurology* **84**, 167-173,  
373 doi:10.1212/WNL.0000000000001123 (2015).
- 374 25 Schiff, N. D. *et al.* Behavioural improvements with thalamic stimulation after severe  
375 traumatic brain injury. *Nature* **448**, 600-603, doi:10.1038/nature06041 (2007).
- 376 26 Vanhoecke, J. & Hariz, M. Deep brain stimulation for disorders of consciousness:  
377 Systematic review of cases and ethics. *Brain Stimul* **10**, 1013-1023,  
378 doi:10.1016/j.brs.2017.08.006 (2017).
- 379 27 Chudy, D. *et al.* Deep brain stimulation in disorders of consciousness: 10 years of a single  
380 center experience. *Scientific Reports* **13**, 19491, doi:10.1038/s41598-023-46300-y (2023).
- 381 28 Yang, Y. *et al.* Long-term functional outcomes improved with deep brain stimulation in  
382 patients with disorders of consciousness. *Stroke Vasc Neurol*, doi:10.1136/svn-2022-  
383 001998 (2023).
- 384 29 Arnts, H. *et al.* Clinical and neurophysiological effects of central thalamic deep brain  
385 stimulation in the minimally conscious state after severe brain injury. *Sci Rep* **12**, 12932,  
386 doi:10.1038/s41598-022-16470-2 (2022).
- 387 30 Arnts, H. *et al.* Deep brain stimulation of the central thalamus restores arousal and  
388 motivation in a zolpidem-responsive patient with akinetic mutism after severe brain injury.  
389 *Sci Rep* **14**, 2950, doi:10.1038/s41598-024-52267-1 (2024).
- 390 31 Schiff, N. D. *et al.* Thalamic deep brain stimulation in traumatic brain injury: a phase 1,  
391 randomized feasibility study. *Nature Medicine*, doi:10.1038/s41591-023-02638-4 (2023).
- 392 32 Zhang, Z. *et al.* State-specific Regulation of Electrical Stimulation in the Intralaminar  
393 Thalamus of Macaque Monkeys: Network and Transcriptional Insights into Arousal. *Adv*  
394 *Sci*, e2402718, doi:10.1002/advs.202402718 (2024).
- 395 33 Luppi, A. I. *et al.* Local orchestration of distributed functional patterns supporting loss and  
396 restoration of consciousness in the primate brain. *Nat Commun* **15**, 2171,  
397 doi:10.1038/s41467-024-46382-w (2024).
- 398 34 Kundu, B., Brock, A. A., Englot, D. J., Butson, C. R. & Rolston, J. D. Deep brain  
399 stimulation for the treatment of disorders of consciousness and cognition in traumatic brain

- 400 injury patients: a review. *Neurosurg Focus* **45**, E14, doi:10.3171/2018.5.FOCUS18168  
401 (2018).
- 402 35 Haddad, A. R., Lythe, V. & Green, A. L. Deep brain stimulation for recovery of  
403 consciousness in minimally conscious patients after traumatic brain injury: a systematic  
404 review. *Neuromodulation: Technology at the Neural Interface* **22**, 373-379,  
405 doi:10.1111/ner.12944 (2019).
- 406 36 Giacino, J. T., Kalmar, K. & Whyte, J. The JFK Coma Recovery Scale-Revised:  
407 Measurement characteristics and diagnostic utility. *Arch Phys Med Rehab* **85**, 2020-2029,  
408 doi:10.1016/j.apmr.2004.02.033 (2004).
- 409 37 Lee, H., Wang, S. & Hudetz, A. G. State-Dependent Cortical Unit Activity Reflects  
410 Dynamic Brain State Transitions in Anesthesia. *J Neurosci* **40**, 9440-9454,  
411 doi:10.1523/JNEUROSCI.0601-20.2020 (2020).
- 412 38 DeBusk, B. C., DeBruyn, E. J., Snider, R. K., Kabara, J. F. & Bonds, A. B. Stimulus-  
413 dependent modulation of spike burst length in cat striate cortical cells. *J Neurophysiol* **78**,  
414 199-213, doi:10.1152/jn.1997.78.1.199 (1997).
- 415 39 Kang, Y. *et al.* Longitudinal alterations in gamma-aminobutyric acid (GABAA) receptor  
416 availability over ~ 1 year following traumatic brain injury. *Brain Communications* **4**,  
417 fcac159, doi:10.1093/braincomms/fcac159 (2022).
- 418 40 Mak, L. E. *et al.* The Default Mode Network in Healthy Individuals: A Systematic Review  
419 and Meta-Analysis. *Brain Connect* **7**, 25-33, doi:10.1089/brain.2016.0438 (2017).
- 420 41 Andrews-Hanna, J. R. The Brain's Default Network and Its Adaptive Role in Internal  
421 Mentation. *Neuroscientist* **18**, 251-270, doi:10.1177/1073858411403316 (2012).
- 422 42 Raichle, M. E. The Brain's Default Mode Network. *Annual Review of Neuroscience* **38**,  
423 433-447, doi:10.1146/annurev-neuro-071013-014030 (2015).
- 424 43 Yeshurun, Y., Nguyen, M. & Hasson, U. The default mode network: where the  
425 idiosyncratic self meets the shared social world. *Nature Reviews Neuroscience* **22**, 181-  
426 192, doi:10.1038/s41583-020-00420-w (2021).
- 427 44 Gusnard, D. A., Akbudak, E., Shulman, G. L. & Raichle, M. E. Medial prefrontal cortex  
428 and self-referential mental activity: Relation to a default mode of brain function. *P Natl*  
429 *Acad Sci USA* **98**, 4259-4264, doi:DOI 10.1073/pnas.071043098 (2001).
- 430 45 Buckner, R. L. & DiNicola, L. M. The brain's default network: updated anatomy,  
431 physiology and evolving insights. *Nature Reviews Neuroscience* **20**, 593-608,  
432 doi:10.1038/s41583-019-0212-7 (2019).
- 433 46 Kucyi, A., Salomons, T. V. & Davis, K. D. Mind wandering away from pain dynamically  
434 engages antinociceptive and default mode brain networks. *P Natl Acad Sci USA* **110**,  
435 18692-18697, doi:10.1073/pnas.1312902110 (2013).
- 436 47 Christoff, K., Gordon, A. M., Smallwood, J., Smith, R. & Schooler, J. W. Experience  
437 sampling during fMRI reveals default network and executive system contributions to mind  
438 wandering. *P Natl Acad Sci USA* **106**, 8719-8724, doi:10.1073/pnas.0900234106 (2009).
- 439 48 Demertzi, A. *et al.* Intrinsic functional connectivity differentiates minimally conscious  
440 from unresponsive patients. *Brain* **138**, 2619-2631, doi:10.1093/brain/awv169 (2015).
- 441 49 Wu, X. *et al.* Intrinsic Functional Connectivity Patterns Predict Consciousness Level and  
442 Recovery Outcome in Acquired Brain Injury. *J Neurosci* **35**, 12932-12946,  
443 doi:10.1523/JNEUROSCI.0415-15.2015 (2015).



- 444 50 Vanhaudenhuyse, A. *et al.* Default network connectivity reflects the level of consciousness  
445 in non-communicative brain-damaged patients. *Brain* **133**, 161-171,  
446 doi:10.1093/brain/awp313 (2010).
- 447 51 Silva, S. *et al.* Disruption of posteromedial large-scale neural communication predicts  
448 recovery from coma. *Neurology* **85**, 2036-2044, doi:10.1212/WNL.0000000000002196  
449 (2015).
- 450 52 Boly, M. *et al.* Intrinsic brain activity in altered states of consciousness - How conscious  
451 is the default mode of brain function? *Ann Ny Acad Sci* **1129**, 119-129,  
452 doi:10.1196/annals.1417.015 (2008).
- 453 53 Luppi, A. I. *et al.* Consciousness-specific dynamic interactions of brain integration and  
454 functional diversity. *Nature Communications* **10**, doi:10.1038/s41467-019-12658-9 (2019).
- 455 54 Qin, P. M. *et al.* How Are Different Neural Networks Related to Consciousness? *Ann*  
456 *Neurol* **78**, 594-605, doi:doi:10.1002/ana.24479 (2015).
- 457 55 Huang, Z. R. *et al.* Decoupled temporal variability and signal synchronization of  
458 spontaneous brain activity in loss of consciousness: An fMRI study in anesthesia.  
459 *Neuroimage* **124**, 693-703, doi:10.1016/j.neuroimage.2015.08.062 (2016).
- 460 56 Ramnani, N. & Owen, A. M. Anterior prefrontal cortex: Insights into function from  
461 anatomy and neuroimaging. *Nature Reviews Neuroscience* **5**, 184-194,  
462 doi:10.1038/nrn1343 (2004).
- 463 57 Song, M. *et al.* Prognostication of chronic disorders of consciousness using brain functional  
464 networks and clinical characteristics. *Elife* **7**, doi:10.7554/eLife.36173 (2018).
- 465 58 Koike, T., Kan, S., Misaki, M. & Miyauchi, S. Connectivity pattern changes in default-  
466 mode network with deep non-REM and REM sleep. *Neurosci Res* **69**, 322-330,  
467 doi:10.1016/j.neures.2010.12.018 (2011).
- 468 59 Liu, X. Y. *et al.* Variation of the default mode network with altered alertness levels induced  
469 by propofol. *Neuropsych Dis Treat* **11**, 2573-2581, doi:10.2147/Ndt.S88156 (2015).
- 470 60 Ilyas, A., Pizarro, D., Romeo, A. K., Riley, K. O. & Pati, S. The centromedian nucleus:  
471 Anatomy, physiology, and clinical implications. *J Clin Neurosci* **63**, 1-7,  
472 doi:10.1016/j.jocn.2019.01.050 (2019).
- 473 61 Sadikot, A. F. & Rymar, V. V. The primate centromedian-parafascicular complex:  
474 Anatomical organization with a note on neuromodulation. *Brain Research Bulletin* **78**, 122-  
475 130, doi:10.1016/j.brainresbull.2008.09.016 (2009).
- 476 62 Benarroch, E. E. The midline and intralaminar thalamic nuclei: anatomic and functional  
477 specificity and implications in neurologic disease. *Neurology* **71**, 944-949,  
478 doi:10.1212/01.wnl.0000326066.57313.13 (2008).
- 479 63 Harris, J. A. *et al.* Hierarchical organization of cortical and thalamic connectivity. *Nature*  
480 **575**, 195-202, doi:10.1038/s41586-019-1716-z (2019).
- 481 64 Arnts, H. *et al.* The intralaminar thalamus: a review of its role as a target in functional  
482 neurosurgery. *Brain Communications*, fcad003, doi:10.1093/braincomms/fcad003 (2023).
- 483 65 Mandelbaum, G. *et al.* Distinct cortical-thalamic-striatal circuits through the parafascicular  
484 nucleus. *Neuron* **102**, 636-652. e637, doi:10.1016/j.neuron.2019.02.035 (2019).
- 485 66 Kim, J. P. *et al.* Centromedian-Parafascicular Deep Brain Stimulation Induces Differential  
486 Functional Inhibition of the Motor, Associative, and Limbic Circuits in Large Animals.  
487 *Biol Psychiat* **74**, 917-926, doi:10.1016/j.biopsych.2013.06.024 (2013).

- 488 67 Sorokin, J. M. *et al.* Bidirectional Control of Generalized Epilepsy Networks via Rapid  
489 Real-Time Switching of Firing Mode. *Neuron* **93**, 194-210,  
490 doi:10.1016/j.neuron.2016.11.026 (2017).
- 491 68 Schiff, N. D. Central thalamic deep-brain stimulation in the severely injured brain:  
492 rationale and proposed mechanisms of action. *Ann N Y Acad Sci* **1157**, 101-116,  
493 doi:10.1111/j.1749-6632.2008.04123.x (2009).
- 494 69 Jennett, B. & Bond, M. Assessment of Outcome after Severe Brain-Damage - Practical  
495 Scale. *Lancet* **1**, 480-484, doi:10.1016/s0140-6736(75)92830-5 (1975).
- 496 70 Warren, A. E. L. *et al.* Targeting the centromedian thalamic nucleus for deep brain  
497 stimulation. *J Neurol Neurosurg Psychiatry* **91**, 339-349, doi:10.1136/jnnp-2019-322030  
498 (2020).
- 499 71 Horn, A. *et al.* Lead-DBS v2: Towards a comprehensive pipeline for deep brain stimulation  
500 imaging. *Neuroimage* **184**, 293-316, doi:10.1016/j.neuroimage.2018.08.068 (2019).
- 501 72 Avants, B. B. *et al.* A reproducible evaluation of ANTs similarity metric performance in  
502 brain image registration. *Neuroimage* **54**, 2033-2044,  
503 doi:10.1016/j.neuroimage.2010.09.025 (2011).
- 504 73 Friston, K. J. *et al.* Statistical parametric maps in functional imaging: a general linear  
505 approach. *Human brain mapping* **2**, 189-210, doi:10.1002/hbm.460020402 (1994).
- 506 74 Sch önecker, T., Kupsch, A., Kühn, A. A., Schneider, G. H. & Hoffmann, K. T. Automated  
507 Optimization of Subcortical Cerebral MR Imaging-Atlas Coregistration for Improved  
508 Postoperative Electrode Localization in Deep Brain Stimulation. *Am J Neuroradiol* **30**,  
509 1914-1921, doi:10.3174/ajnr.A1741 (2009).
- 510 75 Ewert, S. *et al.* Optimization and comparative evaluation of nonlinear deformation  
511 algorithms for atlas-based segmentation of DBS target nuclei. *Neuroimage* **184**, 586-598,  
512 doi:10.1016/j.neuroimage.2018.09.061 (2019).
- 513 76 Vogel, D. *et al.* Anatomical brain structures normalization for deep brain stimulation in  
514 movement disorders. *Neuroimage-Clin* **27**, doi:10.1016/j.nicl.2020.102271 (2020).
- 515 77 Dang, Y. Y. *et al.* Deep brain stimulation improves electroencephalogram functional  
516 connectivity of patients with minimally conscious state. *Cns Neurosci Ther* **29**, 344-353,  
517 doi:10.1111/cns.14009 (2023).
- 518 78 Krauth, A. *et al.* A mean three-dimensional atlas of the human thalamus: generation from  
519 multiple histological data. *Neuroimage* **49**, 2053-2062,  
520 doi:10.1016/j.neuroimage.2009.10.042 (2010).
- 521 79 Chaure, F. J., Rey, H. G. & Quian Quiroga, R. A novel and fully automatic spike-sorting  
522 implementation with variable number of features. *J Neurophysiol* **120**, 1859-1871,  
523 doi:10.1152/jn.00339.2018 (2018).
- 524 80 Oostenveld, R., Fries, P., Maris, E. & Schoffelen, J. M. FieldTrip: Open source software  
525 for advanced analysis of MEG, EEG, and invasive electrophysiological data. *Comput Intell*  
526 *Neurosci* **2011**, 156869, doi:10.1155/2011/156869 (2011).
- 527 81 Richman, J. S. & Moorman, J. R. Physiological time-series analysis using approximate  
528 entropy and sample entropy. *Am J Physiol-Heart C* **278**, H2039-H2049,  
529 doi:10.1152/ajpheart.2000.278.6.H2039 (2000).
- 530 82 Liu, Q., Ma, L., Fan, S. Z., Abbod, M. F. & Shieh, J. S. Sample entropy analysis for the  
531 estimating depth of anaesthesia through human EEG signal at different levels of  
532 unconsciousness during surgeries. *PeerJ* **6**, e4817, doi:10.7717/peerj.4817 (2018).



533 83 Corrigan, B. W. *et al.* Distinct neural codes in primate hippocampus and lateral prefrontal  
534 cortex during associative learning in virtual environments. *Neuron* **110**, 2155-2169,  
535 doi:10.1016/j.neuron.2022.04.016 (2022).

536 84 Power, J. D., Schlaggar, B. L. & Petersen, S. E. Recent progress and outstanding issues in  
537 motion correction in resting state fMRI. *Neuroimage* **105**, 536-551,  
538 doi:10.1016/j.neuroimage.2014.10.044 (2015).

539 85 Keuken, M. C. *et al.* Quantifying inter-individual anatomical variability in the subcortex  
540 using 7 T structural MRI. *Neuroimage* **94**, 40-46, doi:10.1016/j.neuroimage.2014.03.032  
541 (2014).

542 86 Zeidman, P. *et al.* A guide to group effective connectivity analysis, part 1: First level  
543 analysis with DCM for fMRI. *Neuroimage* **200**, 174-190,  
544 doi:10.1016/j.neuroimage.2019.06.031 (2019).

545 87 Friston, K. J., Kahan, J., Biswal, B. & Razi, A. A DCM for resting state fMRI. *Neuroimage*  
546 **94**, 396-407, doi:10.1016/j.neuroimage.2013.12.009 (2014).

547 88 Zeidman, P. *et al.* A guide to group effective connectivity analysis, part 2: Second level  
548 analysis with PEB. *Neuroimage* **200**, 12-25, doi:10.1016/j.neuroimage.2019.06.032 (2019).

549 89 Yeh, F. C. & Tseng, W. Y. I. NTU-90: A high angular resolution brain atlas constructed  
550 by q-space diffeomorphic reconstruction. *Neuroimage* **58**, 91-99,  
551 doi:10.1016/j.neuroimage.2011.06.021 (2011).

552 90 Glasser, M. F. *et al.* A multi-modal parcellation of human cerebral cortex. *Nature* **536**, 171-  
553 178, doi:10.1038/nature18933 (2016).

554 91 Sun, H. *et al.* Network controllability of structural connectomes in the neonatal brain.  
555 *Nature Communications* **14**, 5820, doi:10.1038/s41467-023-41499-w (2023).

556 92 Pedregosa, F. *et al.* Scikit-learn: Machine Learning in Python. *J Mach Learn Res* **12**, 2825-  
557 2830 (2011).

558

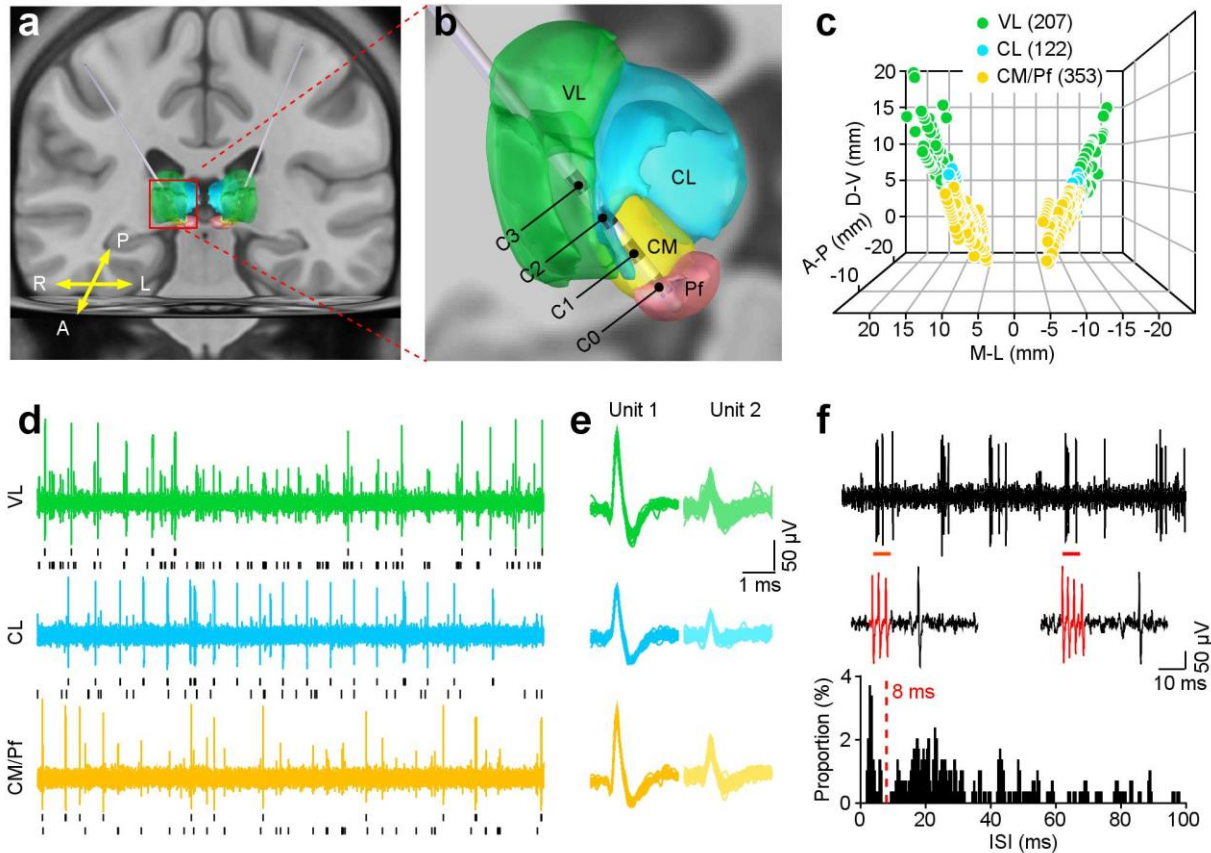

559

560

**Fig. 1 Neuronal spiking recording and DBS applications in the human thalamus.**

561

**a**, Example trajectories in a DoC patient show bilateral implantation of quadripolar DBS leads into the thalamus. A, anterior; P, posterior; R, right; L, left. **b**, Magnification of the right hemisphere

562

(red box in **a**) shows the anatomical structures of three thalamic nuclei (green: ventral lateral

563

nucleus (VL), blue: central lateral nucleus (CL), yellow: centromedian nucleus (CM), and pink:

564

parafascicular nucleus (Pf)), and lead contacts' locations. **c**, Three-dimensional positions of 682

565

thalamic recording sites in 29 patients. **d**, **e**, Examples of neuronal spiking activity in the thalamic

566

nuclei from a patient. (**d**) raw spike traces for 5 seconds, with short black lines representing spike

567

trains of sorted neurons. Their spike waveforms are shown in **e**. **f**, Burst and tonic modes of an

568

example thalamic neuron. From top to bottom: raw spike trace of 1 second with red bars indicating

569

two burst events; the two bursts shown with an expanded time base (red traces with 3 and 4 spikes

570

in each one); distribution of its ISIs with 15.44% of spikes in bursts defined by an inter-spike

571

interval of less than 8 ms.

572

573

574

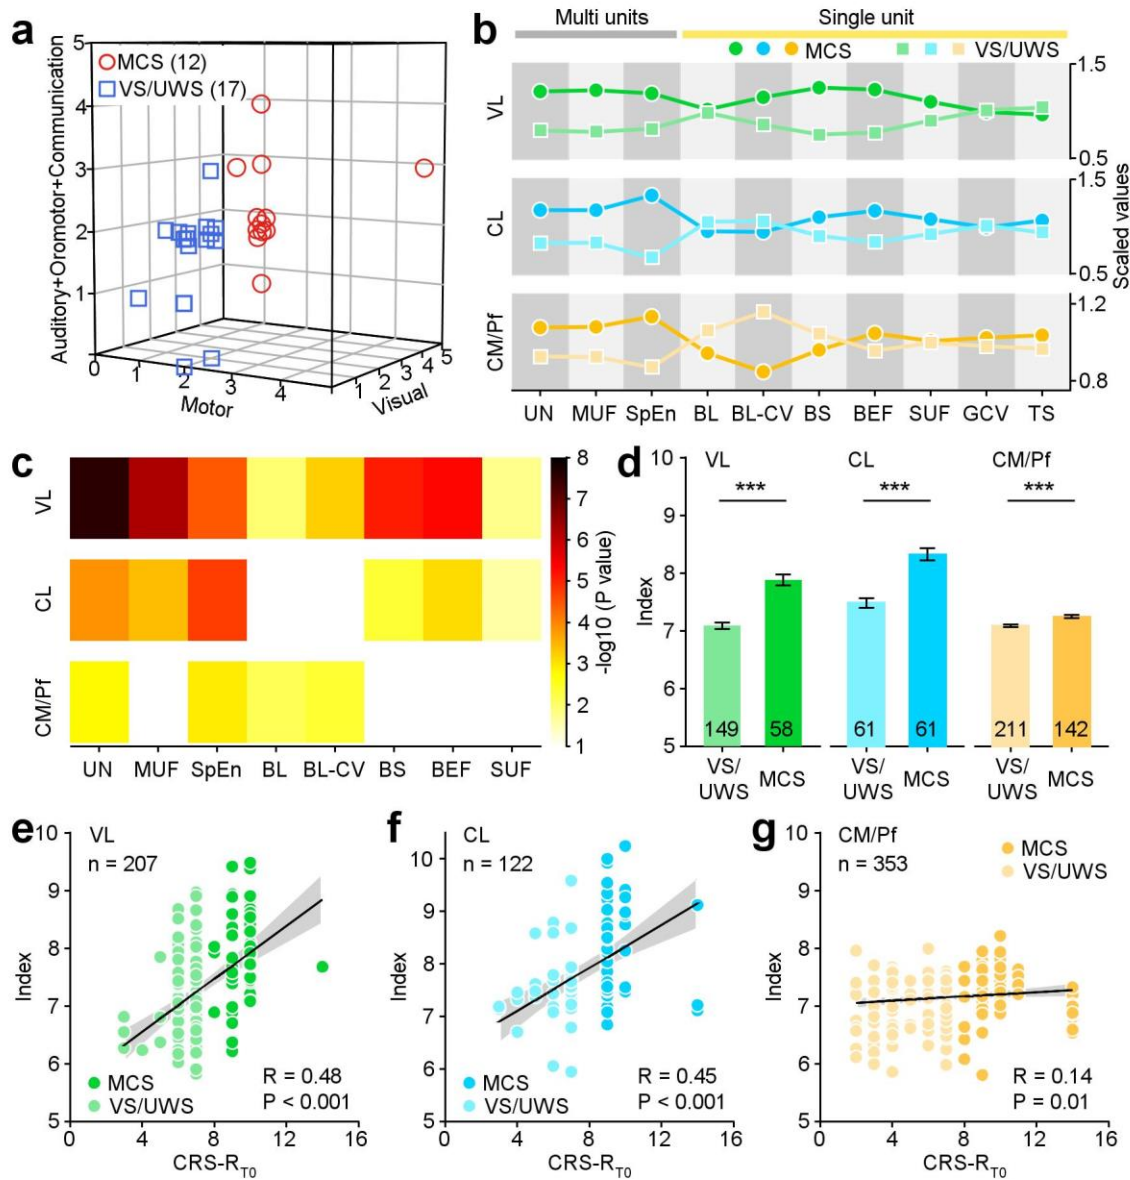

575

576

577

578

579

580

581

582

583

584

585

**Fig. 2 Neuronal signatures of thalamic neurons indicate DoC patients' consciousness levels.**

**a**, 29 patients were diagnosed with MCS and VS/UWS regarding to the classic criteria<sup>36</sup>. **b**, The neuronal signatures in three thalamic nuclei are associated with DoC patients' consciousness states. The scaled values of neuronal signatures were standardized by dividing the responses of each consciousness state by the mean responses across patients. **c**, MCS and VS/UWS have different neuronal signatures of the thalamic nuclei, according to Mann-Whitney-Wilcoxon tests. The colormap illustrates  $P$  values. **d**, Comparisons of neuronal indices of three thalamic nuclei between MCS and VS/UWS (\*\*\*,  $P < 0.001$ , Mann-Whitney-Wilcoxon test, error bars:  $\pm$  SEM). Number in each bar presents the number of recording sites. **e-g**, Positive correlations were observed between neuronal indices of individual recording sites in three thalamic nuclei and CRS-R<sub>T0</sub> total

586 scores (**e**, VL; **f**, CL; **g**, CM/Pf). Black lines represent the linear regression, while shaded areas are  
587 the 95% confidence interval of fitting.  
588

589

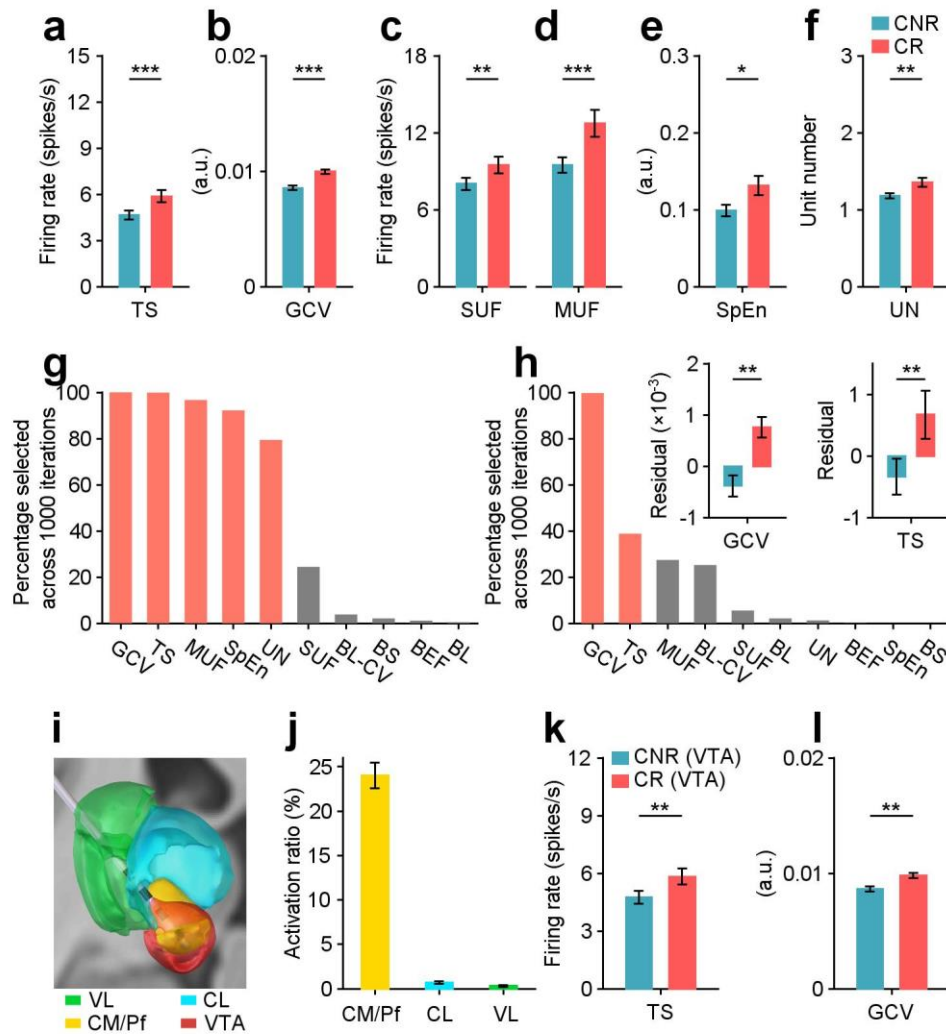

590

591 **Fig. 3 Thalamic neuronal signatures of the CM/Pf indicate arousal regulations following DBS**  
 592 **in DoC patients.**

593 **a-f**, Comparisons of TS, GCV, SUF, MUF, SpEn and UN of the CM/Pf between CR (119 recording  
 594 sites from 10 patients) and CNR (234 recording sites from 19 patients) groups. \*,  $P < 0.05$ ; \*\*,  $P$   
 595  $< 0.01$ ; \*\*\*,  $P < 0.001$ , Mann-Whitney-Wilcoxon test. Error bars:  $\pm$  SEM. **g**, Five top neuronal  
 596 signatures of the CM/Pf were able to differentiate between CR and CNR (defined by F values,  
 597 ANOVA), by using a cross-validated supervised machine learning model. **h**, Elimination the  
 598 impact of patients' preoperative consciousness states on neuronal signatures by a linear regression.  
 599 GCV and TS of the CM/Pf consistently differ CR and CNR effectively. **i**, Estimation of the DBS  
 600 VTA (red area) through the C0 contact in the example DoC patient (shown in **Fig. 1b**). **j**,  
 601 Activation ratios represent the proportion of the VTA within each nucleus across patients, relative  
 602 to the total volume of that nucleus. **k, l**, Comparisons of TS (**k**) and GCV (**l**) of recording sites  
 603 located within the VTA area of the CM/Pf, between the CR and CNR groups.



604

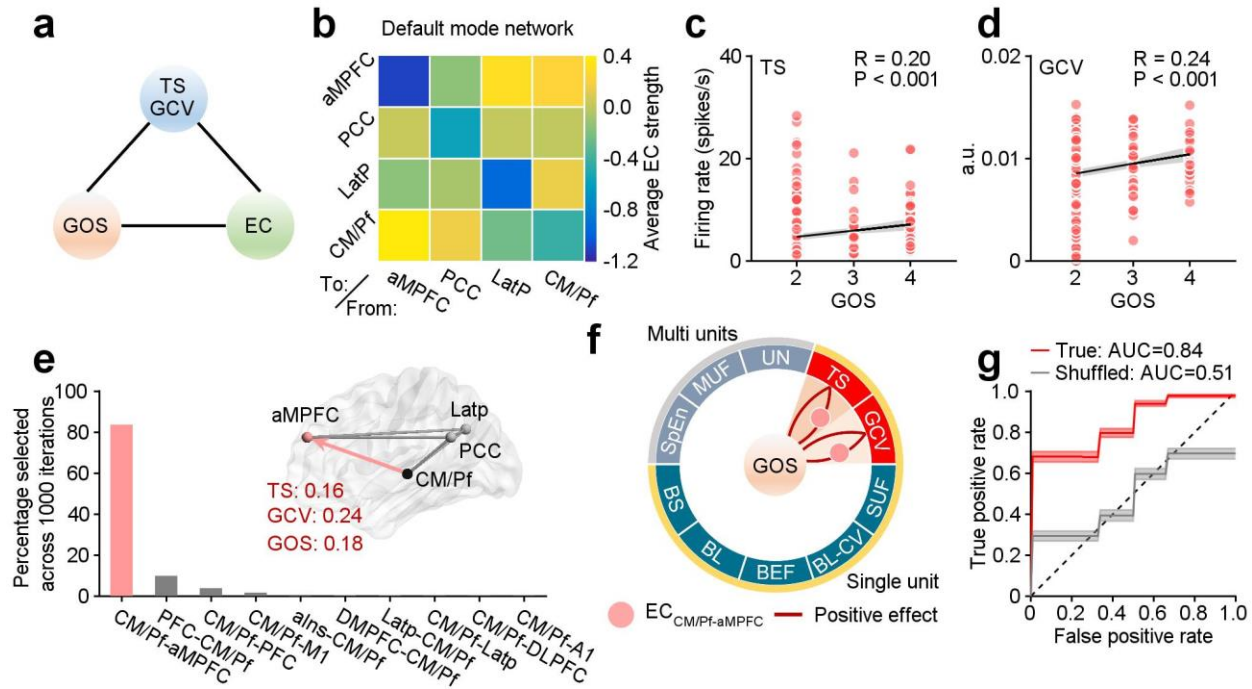

605

606 **Fig. 4 DoC patients' thalamic firing linked with thalamocortical connections to predict**  
 607 **outcomes following DBS.**

608 **a**, Schematic diagram of pairwise relationships between neuronal signatures, GOS scores, and ECs.  
 609 **b**, Effective connectivity between the CM/Pf and cortical areas in the default mode network,  
 610 averaging across 17 patients with qualified rs-fMRI data. **c**, **d**, Correlation between neuronal  
 611 signatures of 306 recording sites from 17 patients (TS: **c**, and GCV: **d**) and GOS scores, measured  
 612 by Pearson's correlation coefficient. The solid lines represent linear regression, whereas shaded  
 613 areas represent 95% confidence intervals. **e**, The top connection selected by F values of ANOVA  
 614 test was able to discriminate the CR group from the CNR group in our dataset. The thalamocortical  
 615 connection from the CM/Pf to the aMPFC was positively correlated with GOS scores and thalamic  
 616 neuronal signatures, with related effect sizes listing in red fonts. **f**, Summary of relationships  
 617 between thalamic signatures, ECs and DBS outcomes in DoC patients. The ring contains ten  
 618 neuronal signatures of the CM/Pf. Seven of them were defined from single units (yellow arcs),  
 619 whilst the remaining three signatures were estimated from multiple units (gray arcs) of each  
 620 recording site. Pink spots present the  $EC_{CM/Pf-aMPFC}$ . Lines indicate "logic" loops of correlations  
 621 between neuronal signatures (TS and GCV), the  $EC_{CM/Pf-aMPFC}$ , and GOS scores, with red lines  
 622 representing positive effects. **g**, Receiver operating characteristic curves to predict recovery  
 623 outcomes based on the top neuronal signatures (TS and GCV) and the top connection ( $EC_{CM/Pf-}$   
 624  $aMPFC$ ) from individual patients, reflecting the Mean  $\pm$  SEM over 1000 times for the true (red) and  
 625 shuffled (gray) models.

626



## 627 **Methods**

### 628 **DoC patients**

629 This retrospective research included a total of 29 patients who were confirmed with DoC and  
630 received thalamic DBS as their clinical treatments (Extended Data Fig. 1). They were diagnosed  
631 in a MCS (12 patients) or a VS/UWS (17 patients) by neurosurgeons according to CRS-R scores.<sup>36</sup>  
632 These patients exhibited prolonged DoC for a minimum of 28 days after brain injury, without  
633 serious structural brain damage or abnormalities. The preoperative consciousness states were  
634 scored as CRS-R<sub>T0</sub> (Extended Data Fig. 1a). Follow-up assessments were normally scheduled at  
635 four intervals after the DBS surgery: 1 month, 3 months, 6 months and 12 months. The GOS<sup>69</sup> was  
636 used as the main prognostic assessment, and the follow-up CRS-R was assessed to monitor  
637 consciousness states following DBS.<sup>57</sup> Patients who showed ongoing improvement were evaluated  
638 based on the 12-month follow-up outcomes. Data from the most favorable follow-up assessment  
639 were considered for patients whose condition deteriorated due to complications. Both GOS and  
640 CRS-R scores of patients were assessed by experienced neurosurgeons among the 12-month  
641 follow-up assessments (T<sub>12</sub> in Extended Data Fig. 1a). Extended Data Table 1 detailed patients'  
642 information.

643 The clinical dataset analyzed in the study was acquired from DoC patients undergoing clinical  
644 treatments at the Neurosurgery Departments of two hospitals. The study was approved by the  
645 Ethics Committee of Beijing Tiantan Hospital, Capital Medical University (protocol No: KY2017-  
646 361-01) and the Ethics Committee of PLA Army General Hospital (protocol No: 2011-0415). The  
647 patient's parents or legal guardians signed two patient consent forms after receiving thorough  
648 information and discussion about the treatment processes. One consent form provided  
649 comprehensive details about the treatment processes, outlining the surgical procedure,  
650 accompanying risks, and the potential for the treatment to be entirely ineffective. The other consent  
651 form pertained to research participation, stating that patients' data obtained before, during and  
652 after surgery (such as MRI, CT, intraoperative thalamic spiking recordings and behavioral  
653 assessments) would be utilized for prospective research analyses. Both consent forms ensured that  
654 patient's parents or legal guardians were fully informed and gave consent to aspects of the  
655 treatment and potential prospective research. All clinical data utilized in this study were examined  
656 and gathered to serve for clinical treatments. There were no extra examinations attached for  
657 research purposes.

658

### 659 **Blinding**

660 The collection and analyze of patients' data were conducted by separate groups of  
661 investigators in a completely blinded fashion. Investigators from two Neurosurgery Departments  
662 who collected clinical data were blinded to the properties of functional brain connectivity in DoC  
663 patients and their full sets of thalamic spiking signatures. Investigators from the Institute of  
664 Biophysics who performed the analyses on thalamic spiking profiles and the brain connections  
665 were blinded to patients' states of consciousness and the outcomes of DBS until they finished all  
666 the spiking signatures and brain connections analyses.

667

## 668 **MRI acquisition**

669 Prior to surgery (T<sub>0</sub>, Extended Data Fig. 1a), patients received resting-state functional  
670 magnetic resonance imaging (rs-fMRI), T1-weighted 3D high-resolution and diffusion MRI  
671 scanning. During the MRI scan, no sedatives or anesthetics were administered to the patients. Rs-  
672 fMRI scans were acquired using a T2-weighted gradient echo sequence and diffusion MRI scans  
673 were acquired using a EP/SE sequence on 3.0 T scanners. Details of scanning information were  
674 listed in Extended Data Table 2.

675

## 676 **DBS implantation and reconstruction of lead trajectories during surgery**

677 The surgical planning was designed by *Leksell SurgiPlan* for utilization with the *Leksell*  
678 stereotactic system (Elekta, Stockholm, Sweden). The anatomical location of the CM/Pf was 7.8-  
679 9.7 mm posterior to the middle of the anterior commissural (AC)-posterior commissural (PC) line,  
680 8.8-10.5 mm distal to the AC-PC line (4.5-5.5 mm from the ventricular wall), and 0-1.5 mm  
681 inferior to the AC-PC plane<sup>28</sup>. Twenty-seven patients had bilateral implantation of quadripolar  
682 DBS leads (Medtronic #3387, USA, or PINS L302, China), while two patients had unilateral  
683 implantation, for a grand total of 56 trajectories (Extended Data Fig. 1c). Microelectrode  
684 recordings were employed during surgery when patients recovered from anesthesia to help  
685 determine the targeting location of the CM/Pf, as this required the use of considerably less  
686 distracting background noise and neuronal activities<sup>28,70</sup>. The thalamic activities, as observed  
687 through single-unit and multi-unit frequencies in our data, exhibited a decrease when  
688 microelectrodes were introduced through VL, CL to CM/Pf (Extended Data Figs. 1d,e). Then,  
689 DBS leads were implanted into the thalamus along the same path as the microelectrodes. Standard  
690 punctures involved microelectrodes and leads entering the thalamus at the VL, traversing the CL,  
691 and aiming for a region between the CM and PF (Fig. 1b).

692 To verify the accuracy of their placements, postoperative CT or MRI images were utilized to  
693 reconstruct lead trajectories applying Lead-DBS software version 2.5.3 ([https://www.lead-  
694 dbs.org/](https://www.lead-dbs.org/))<sup>71</sup>. Using Advanced Normalization Tools (ANTs)<sup>72</sup> and Statistical Parametric Mapping  
695 (SPM12)<sup>73</sup>, respectively, postoperative CT and MRI brain images were co-registered to  
696 preoperative MRI. Coarse subcortical mask<sup>74</sup> was conducted (as implemented in Lead-DBS) to  
697 eliminate bias generated by brain shift that might occurred during surgery. Images were  
698 nonlinearly normalized to the Montreal Neurological Institute (MNI, ICBM 2009b nonlinear  
699 asymmetric) template space using the SyN Diffeomorphic Mapping approach implemented in  
700 ANTs, with the preset “Effective: Low Variance + subcortical refinement” to acquire a most  
701 precise subcortical alignment between patients and MNI space. This method was considered to  
702 have the best performance on subcortical registrations, which was proposed by a recent  
703 comparative study<sup>75</sup> evaluated 6 different nonlinear atlas-based subcortical normalization and  
704 segmentation methods, and reproduced independently by another study<sup>76</sup>. The trajectories were  
705 then reconstructed automatically using the TRAC/CORE approach and manually modified to

706 evaluate the contact points with more precision. Hence, lead trajectories were reconstructed and  
707 contact coordinates were transformed into MNI space.

708

### 709 **DBS stimulation and the volume of tissue activated (VTA) modeling**

710 The DBS stimulation was administered seven days after the operation, after the incision had  
711 healed and the edema generated by the puncture had subsided. Periodic electrical stimulation was  
712 delivered via C0 contact to the CM/Pf of patients (Extended Data Fig. 1c). The primary stimulation  
713 source was monopolar and consisted of 100 Hz, 120  $\mu$ s, and 3.0-4.0 V<sup>28,77</sup>. Continuous stimulation  
714 was administered from 8 AM to 8 PM with a cycle of 15 min on and 15 min off (Extended Data  
715 Fig. 1b).

716 To evaluate effective activation fields of DBS, we simulated the volume of tissue activated  
717 in patients' native space based on contact configuration and stimulation voltage settings by using  
718 a finite element method<sup>71</sup>. A volume conductor model was conducted based on a four-  
719 compartment mesh that separated perielectrode tissue into gray matter (nuclei were defined by  
720 Krauth/Morel thalamic atlas<sup>78</sup>), white matter, electrode conducts and insulated parts. Then, the  
721 activation field distribution was simulated using an adaptation of the FieldTrip-SimBio pipeline  
722 implemented in Lead-DBS and transformed to MNI space using the aforementioned normalization  
723 warp fields. To define the binary activation field, a threshold of 0.2 V/mm<sup>71</sup> was applied. We  
724 simulated activation fields with voltages ranging from 3.0 to 4.0 V and obtained similar results.  
725 The data with a voltage setting of 3.5 V were demonstrated in Figure 3f.

726

### 727 **Intraoperative microelectrode recordings (MERs)**

728 Anesthesia with the propofol was terminated 30 minutes prior to MERs during surgery.  
729 Microelectrodes with a single channel were used intraoperatively to record neuronal activities  
730 (LeadPoint System, Medtronic, USA; Neuro Nav, Alpha Omega, Israel). Signals were sampled at  
731 24 kHz and subjected to hardware-based bandpass filtering (500-5000 Hz) and notch filtering (50  
732 Hz). Each site was recorded for 10 seconds. MER acquisitions generally began 10-11 mm above  
733 the target and advanced in 0.5 mm steps to a depth of 1-3 mm below the target.

734 The anatomical position of recording sites was identified based on their depths in millimeters  
735 (relative to the target position) along the lead trajectories reconstructed. This resulted in three-  
736 dimensional coordinates for MERs in both brain hemispheres. According to the lowest Euclidean  
737 distance between recording sites and masks from the Krauth/Morel thalamic atlas, recording sites  
738 were allocated to the thalamic nuclei from whence they originated<sup>78</sup>. 731 recording sites located  
739 in the thalamus from 29 individuals were included in the subsequent spike sorting analysis.

740

### 741 **Spike sorting**

742 We used a Wave\_clus MATLAB tool ([https://github.com/csn-le/wave\\_clus](https://github.com/csn-le/wave_clus))<sup>79</sup> for spike  
743 identification and sorting with default parameters. The processes of this algorithm are outlined  
744 below. The raw MER data were zero-phase filtered with a fourth-order bandpass elliptic filter  
745 between 500 and 5000 Hz. Spikes were detected with an automatic amplitude threshold, which

746 was set as 5 times the estimated standard deviation of the noise. During the feature extraction phase,  
747 wavelet coefficients of each detected spike were retrieved using a four-scale multiresolution  
748 decomposition with a Haar wavelet. Ten wavelet coefficients with the greatest capacity for  
749 distinguishing different spike waveform shapes were chosen through a Lilliefors modification of  
750 the Kolmogorov-Smirnov Test of Normality. At last, an unsupervised super-paramagnetic  
751 clustering approach was used performed to classify spike waveform characteristics into different  
752 clusters based on the 11-nearest neighbor interactions. The main parameter that affect the  
753 performance of super-paramagnetic clustering is the ‘temperature’. This parameter’s range was set  
754 from 0 to 0.25 in steps of 0.01. Optimal temperature was determined as the highest temperature  
755 when a cluster contained at least 20 members. We calculated the signal-to-noise ratio (SNR) of  
756 single unit as the amplitude of mean waveform (trough-to-peak) divided by the standard deviation.  
757 ISI violation percentage was also calculated as the percentage of all spikes with ISI smaller than 1  
758 ms. Only units with SNR greater than or equal to 2 and ISI violation less than or equal to 1 % were  
759 used in further analyses. Spikes within 1 ms ISI were removed from spike trains.

760 Using the spike sorting approach, we have gathered 1016 neurons from a total of 731 thalamic  
761 recording sites. 94.49% of them (960 out of 1016) exhibit two distinct firing modes, burst and  
762 tonic. The subsequent investigations of neuronal signatures focused on these 960 neurons from  
763 682 sites.

764

### 765 **Single unit and multi units**

766 We evaluated neuronal signatures of the 682 recording sites based on their single unit and  
767 multi-unit activities: 207 sites were in the VL (including anterior and posterior subdivisions), 122  
768 sites were in the CL, and 353 sites were in the CM/Pf (Fig. 1c). There were multiple neurons  
769 recorded at 42.51% (88/207), 31.97% (39/122) and 18.41% (65/353) of the recording sites in these  
770 three thalamic nuclei. The single-unit studies included analyses of single-neuron firing rate, burst,  
771 and tonic activity. In order to mitigate potential bias towards specific types of thalamic neurons at  
772 each recording site, we conducted analyses on the mean responses across neurons to present  
773 signatures on the single-neuron level if there were multiple units recorded at a given site. The  
774 multi-unit firing rates, neuron numbers, and sample entropy were utilized to describe the neuronal  
775 signatures of multiple units at that site. The neuronal firing rates were computed by dividing the  
776 amount of spikes by the recording duration.

777

### 778 **Burst and tonic modes**

779 To capture the temporal properties of neuronal firing, we generated the inter-spike interval  
780 histograms with a bin width of 0.5 ms for each single unit using FieldTrip software  
781 (<https://www.fieldtriptoolbox.org/>)<sup>80</sup>. The burst mode was defined by clusters of at least two spikes  
782 with ISIs less than 8 milliseconds (Fig. 1f). We calculated burst frequency (BF, bursts per second),  
783 burst length (BL, spikes per burst)<sup>38</sup>, and burst length’s coefficient of variation (BL-CV). In  
784 addition, we established burst events by considering with ISIs that were less than 5 ms and 10 ms,  
785 and obtained comparable results.

786

## 787 **Sample entropy (SpEn)**

788 Sample entropy was applied to assess the regularity and complexity of time series. It is  
789 theoretically similar to approximate entropy, but more precise<sup>81</sup>. A low value of SpEn often  
790 indicates a high degree of regularity<sup>37,82</sup>. Here, we utilized SpEn to estimate the irregularity of  
791 multi-unit activities. Spike trains of multi units were convolved with a Gaussian kernel having a  
792 standard deviation of 25 ms (FieldTrip function `ft_spikedensity`) in order to obtain continuous  
793 signals, and then down sampled to 125 Hz<sup>37</sup>. To calculate the SpEn, a time series of finite length  $N$ ,  
794  $x(i)$ ,  $1 \leq i \leq N$ , was first embedded with a dimension of  $m$ :

$$795 X_m(i) = \{x(i), x(i+1), x(i+2), \dots, x(i+m)\}, \quad i = 1, 2, \dots, N-m$$

796 Then, the probability that  $X_m(j)$  is within distance  $r$  of  $X_m(i)$  was defined as follows:

$$797 C_i^m(r) = (N-m)^{-1} \sum_{j=1}^{N-m} \Theta(d[X_m(i), X_m(j)] - r)$$

798 where  $\Theta$  is the Heaviside function and  $d$  is the Chebyshev distance between  $X_m(i)$  and  $X_m(j)$ .  
799 The embedding dimension  $m$  was set as 3 and distance criteria  $r$  was set as 0.2 SD of continuous  
800 signals of multi units<sup>37</sup>.

801 Finally, the SpEn was defined as:

$$802 \text{SpEn} = \log \left( (N-m)^{-1} \sum_{i=1}^{N-m} C_i^m(r) \right) - \log \left( (N-m)^{-1} \sum_{i=1}^{N-m} C_i^{m+1}(r) \right)$$

803 The measure was implemented by the MATLAB function SpEn ([files owned by Kijoon Lee; https://www.mathworks.cn/matlabcentral/fileexchange/35784-sample-entropy](https://www.mathworks.cn/matlabcentral/fileexchange/35784-sample-entropy)).

805

## 806 **Geometric coefficient of variation (GCV)**

807 In order to evaluate the variability in spiking time of each single neuron, we used the  
808 following formula to quantify the GCV<sup>83</sup> of ISIs below 40 ms:

$$809 \text{GCV} = \sqrt{e^{S^2} - 1}$$

810 where  $S$  is the standard deviation of ISIs. GCV is high when spikes are more sparsely distributed,  
811 it is low when spikes are clustered as burst event with regular ISIs.

812

## 813 **Partial Least Squares (PLS) regression analyze and neuronal index definition**

814 PLS regressions were performed to predict consciousness levels based on patients' CRS-R<sub>T0</sub>  
815 and neuronal signatures (independent variables). Only those signatures (four signatures in the  
816 CM/Pf, six signatures in the CL, and eight signatures in the VL) passed the statistical test between  
817 MCS and VS/UWS groups were applied in the PLS regression analyses (Fig. 2c, Matlab function  
818 `plsregress`). The PLS model returned the regression coefficient of each neuronal signature and the  
819 intercept term (Extended Data Fig. 2a). Then, the neuronal index was defined using the following  
820 formula:



823

$$\text{Neuronal Index} = \beta_0 + \sum_{i=1}^n \beta_i * S_i$$

821 where  $\beta_0$  is the intercept term,  $\beta_i$  is the regression coefficient of the  $i$ th neuronal signature  $S$ ,  $n=8$   
822 in the VL,  $n=6$  in the CL, and  $n=4$  in the CM/Pf.

824

### 825 **Resting-state image preprocessing and effective connectivity analyses**

826 In this study, 18 of 29 patients were accessible for rs-fMRI Analysis. fMRI preprocessing and  
827 connectivity analyses were carried out as described in previous research<sup>57</sup>. For the analysis of  
828 resting-state fMRI images, SPM12 (<https://www.fil.ion.ucl.ac.uk/spm/software/spm12/>) and  
829 freely accessible programs (<https://github.com/elifesciences-publications/pDOC>) were utilized.  
830 The preprocessing steps comprised the elimination of the initial five volumes, slice timing, head  
831 motion correction, spatial smoothing with a 6-mm Gaussian kernel, nuisance signal regression,  
832 and temporal bandpass filtering (0.01-0.08 Hz). During the nuisance signal regression, linear  
833 regression was utilized to eliminate the impact of head motion (12 motion parameters, including  
834 roll, pitch, yaw, translation in three dimensions and their first derivatives), whole brain signals and  
835 linear trends. To minimize the effects of motion artifact on functional connectivity analysis,  
836 framewise displacement of head movement was evaluated, and volumes with large movements  
837 also were removed. It is the sum of the absolute values of the translational and rotational  
838 realignment estimates' derivatives (after converting the rotational estimates to displacement at 50  
839 mm radius)<sup>84</sup>. Volumes with framewise displacement more than 1.5 mm were discarded, and  
840 patients with less than 50 remaining volumes were excluded for further analysis. According to  
841 these criteria, one (No. 08) of 18 patients with rs-fMRI was discarded. The subsequent effective  
842 connectivity analyses were conducted using the 17 patients' rs-fMRI data.

843 Next, we utilized the dynamic casual modeling (DCM) module of SPM12 to examine the  
844 effective connectivity between thalamic nuclei (CM/Pf and CL) and cortical regions in six brain  
845 networks (the default mode, executive control, salience, sensorimotor, auditory, and visual  
846 networks, Extended Data Figs. 3a-f), as well as between thalamic nuclei and the striatum  
847 (Extended Data Fig. 3g). The default mode network includes the anterior medial prefrontal cortex  
848 (aMPFC), posterior cingulate cortex/precuneus (PCC), and lateral parietal cortex (LatP). The  
849 execute control network consists of the dorsal medial prefrontal cortex (DMPFC), the anterior  
850 prefrontal cortex (PFC), the superior parietal cortex (SPC), and the dorsal lateral prefrontal cortex  
851 (DLPFC). The orbital frontoinsula (AIns) and the dorsal anterior cingulate cortex (dACC) are  
852 salience network components. Sensorimotor network is composed of primary motor cortex (M1)  
853 and supplementary motor area (SMA). The primary auditory cortex (A1) and the middle cingulate  
854 cortex (MCC) constitute the auditory network. The primary visual cortex (V1) and the associative  
855 visual cortex (V4) make up the vision network. The ROIs of CM/Pf and CL were established by  
856 the Krauth/Morel atlas<sup>78</sup>. The ROIs of cortical regions within six brain networks were identified  
857 by the methods developed by Song et.al<sup>57</sup>. The ROIs of striatum were established by the atlas of  
858 the basal ganglia (ATAG)<sup>85</sup>. The combination of voxels from both hemispheres produced the  
859 thalamic ROI and fourteen cortical ROIs. The first principal component of the time series from



860 each ROI was computed by SPM12 and saved as the volume of interest (VOI) for that ROI.  
861 Extracted VOIs were used in subsequent DCM analysis.

862 Each thalamocortical DCM model featured CM/Pf or CL and brain regions in a particular  
863 network. The effective connectivity includes the reciprocal connections between these brain  
864 regions, and their self-connections within each region. Due to the efficacy of the spectral DCM  
865 (sDCM) approach in analyzing rs-fMRI data<sup>86</sup>, these models were estimated for each patient using  
866 the sDCM method<sup>87</sup>. The estimated model parameters were averaged across patients using  
867 Bayesian fixed effect averaging method (`spm_dcm_average`). The group-level analyses were  
868 performed using the Parametric Empirical Bayes (PEB) method (`spm_dcm_peb` and  
869 `spm_dcm_peb_bmc`)<sup>88</sup>. The effects of neuronal signatures and GOS were evaluated by specifying  
870 them as the covariates of the second-level design matrix. The design matrix consisted of two  
871 columns of covariates: the first column was ones (to model the commonality effect across patients,  
872 i.e., the constant or group mean), and the second column represented the between-subject  
873 influences of neuronal signatures or GOS (mean-centered). Before being specified as a covariate,  
874 a given neuronal signature was averaged across CM/Pf neurons for each patient, and then the mean  
875 values of that signature were z-scored across patients. To focus on the parameters with stronger  
876 evidence, we applied a threshold to the Bayesian Model Average in PEB, selecting only those  
877 having a 99% posterior probability of being present vs. absent (thresholding based on the free  
878 energy, Figs. 4e,f; Extended Data Figs. 4a,b and 5i,j).

879

### 880 **Structure connectome**

881 We analyzed structure connectome between the thalamic nuclei and cortical areas, as well as  
882 the striatum (Extended Data Figs. 3h,i), using diffusion MRI data of DoC patients, conducted by  
883 DSI-Studio ([DSI-Studio: A Tractography Software Tool for Diffusion MRI Analysis | DSI Studio Documentation \(labsolver.org\)](https://www.labsolver.org/DSI-Studio)). After preprocessing (motion correction and removing eddy  
884 current distortion), the 1.25 mm isotropic resolution spin distribution function (SDF) of each  
885 patient was reconstructed to MNI space. This reconstruction was achieved using the Q-space  
886 diffeomorphic reconstruction (QSDR) method<sup>89</sup>, with a diffusion sampling length ratio of 1.25.

887 A deterministic fiber tracking algorithm was utilized to achieve whole brain tracking, tracking  
888 parameters were set as: angular threshold = 0, step size = 0, minimum length = 30 mm, maximum  
889 length = 300 mm, number of tracts = 1000000. The ROIs of cortical areas were defined using the  
890 HCP-MMP atlas<sup>90</sup> built-in DSI-Studio, the ROIs of striatum were defined using the atlas of the  
891 basal ganglia (ATAG)<sup>85</sup>, and the ROIs of thalamic nuclei were defined using the Krauth/Morel  
892 atlas<sup>78</sup>. The connectivity matrix was calculated by considering the number of tracts that pass  
893 through paired ROIs. For each DoC patient and HCP subject, a threshold of 0.001<sup>91</sup> (the ratio to  
894 the maximum connecting tracks in the connectivity matrix) was used to filter out the connectivity  
895 matrix. Connectivity matrices of individuals were averaged to obtain the average matrix which  
896 was also filter out using the threshold of 0.001.

897

### 898 **Feature selection and logistic regression analyses**

900 Feature selection was conducted using the algorithm of `f_classif` implanted in Python library  
901 of Scikit-learn<sup>92</sup>, it computes the ANOVA F-value to select the most distinguishing features  
902 between consciousness recovery and non-recovery groups. Two independent classification  
903 analyses were separately performed on 10 neuronal signatures and 32 brain connections (30  
904 connections between thalamic nuclei and cortical regions, 2 connections between thalamic nuclei  
905 and the striatum). Binary classifications were carried out with penalized logistic regression through  
906 the algorithm of LogisticRegression of Scikit-learn<sup>92</sup>. Briefly, the label  $y_i$  of data point  $i$  takes  
907 values in the set  $[0, 1]$  (0 for consciousness non-recovery and 1 for recovery), and the probability  
908 of positive class was predicted as:

$$909 \quad p = \frac{1}{1 + e^{-(\beta_0 + \beta_i X_i)}}$$

910 where  $\beta_0$  is the intercept of the logistic regression model,  $\beta_i$  is the slope coefficients of the model,  
911  $X_i$  are features. To optimize model parameters, the L2 regularization term  $r(\beta)$  was combined to  
912 minimize the cost function:

$$913 \quad \min_C \sum_{i=1}^n (-y_i \log p - (1 - y_i) \log(1 - p)) + r(\beta).$$

914

915 The logistic regression classification was cross-validated using the k-folds method (5 folds  
916 for neuronal signatures and 4 folds for effective connectivity) and repeated 1000 times to establish  
917 stability in feature importance histograms (Figs. 3g,h and Fig. 4e) and AUC scores (Fig. 4g). The  
918 shuffling analysis was conducted by randomly permuting class labels 1,000 times, and the output  
919 of the logistic classifier was compared with results of the shuffled data.

920

## 921 **Statistical analysis**

922 The neuronal signatures and neuronal indices of MCS and VS/UWS patients (Figs. 2c,d), as  
923 well as neuronal signatures between the recovery and non-recovery groups (Figs. 3a-f, h, k, l and  
924 Extended Data Figs. 5a-e) were compared utilizing a Mann-Whitney-Wilcoxon test. The frequency  
925 of single-unit and multi-unit activity in the CM/Pf, the CL and the VL were compared using a one-  
926 way analysis of variance (ANOVA) test, followed by a post-hoc Tukey-Kramer test for pairwise  
927 comparisons between thalamic nuclei (Extended Data Figs. 1d,e). Statistical analysis was  
928 conducted to determine the comparisons, using a significance level of 0.05. Pearson's correlation  
929 coefficient was used to measure the correlation between neuronal index and CRS-R<sub>T0</sub> and between  
930 neuronal signatures and GOS scores (Figs. 2e-g; 4c, d; Extended Data Figs. 2b, c; 5h).

931

## 932 **Data availability**

933 Datasets supporting the findings of this study are available from the corresponding authors on  
934 reasonable request.

935

## 936 **Code availability**

937 A spike sorting toolbox `Wave_clus` was used to identify neuronal spikes ([https://github.com/csn-](https://github.com/csn-le/wave_clus)  
938 [le/wave\\_clus](https://github.com/csn-le/wave_clus)). The SPM12 (<https://www.fil.ion.ucl.ac.uk/spm/software/spm12/>) and freely  
939 accessible programs (<https://github.com/elifesciences-publications/pDOC>) were used to analyze

940 rs-fMRI data. Trajectories of DBS leads were reconstructed using Lead-DBS software  
941 (<https://www.lead-dbs.org/>). The analysis of ISI and spike train convolution of multi units were  
942 performed by Fieldtrip software (<https://www.fieldtriptoolbox.org/>). PLS regression was achieved  
943 using the MATLAB function plsregress. The computation of SpEn was based on the MATLAB  
944 function SpEn (<https://ww2.mathworks.cn/matlabcentral/fileexchange/35784-sample-entropy>,  
945 files owned by Kijoon Lee). Feature selection and cross-validated logistic regression were  
946 conducted using Scikit-learn (<https://scikit-learn.org>). Custom codes used in the study are available  
947 from the corresponding authors on request.  
948

949 **Acknowledgments**

950 This study was supported by Beijing Natural Science Foundation grant Z210009 (to Yan Y.);  
951 National Science and Technology Innovation 2030 Major Projects, STI2030-Major Projects grant  
952 2022ZD0204800 (to Yan Y.); National Key R&D Program of China grant 2022YFB4700101 (to  
953 H.W.); National Natural Science Foundation of China grant 32070987 and 31722025 (to Yan Y.);  
954 Chinese Academy of Sciences Key Program of Frontier Sciences grant QYZDB-SSW-SMC019  
955 (to Yan Y.). S.L. is funded as Chairholder from the Canada Excellence Research Chair in  
956 Neuroplasticity; as Research Director at the Belgian National Fund for Scientific Research; the  
957 European Foundation of Biomedical Research, the Foundation for Research and Rehabilitation of  
958 Neurodegenerative Diseases and the National Natural Science Foundation of China (Grant No.:  
959 81920108023).

960 We thank members of our laboratory for helpful comments on an earlier version of the manuscript  
961 and for helpful discussions. Fred Yang Qu for suggestions on our figure illustration on an earlier  
962 version. We thank the License of Krauth/Morel thalamic atlas provided by Axel Krauth, Rémi  
963 Blanc, Alejandra Poveda, Daniel Jeanmonod, Anne Morel, and Gábor Székely at University of  
964 Zurich and ETH Zurich.

965

966 **Author contributions**

967 Conceptualization: Yan Y. and H.W.;;  
968 Methodology: Yan Y. and H.W.;;  
969 Investigation: H.W., Yan Y., Y.H., P.Z., S.H., S.L., Y.D., Yi Y., Q.G., L.X., X.X., and J.H.;;  
970 Clinical Data Resources: Y.D., Yi Y., Q.G., L.X., X.X., and J.H.;;  
971 Formal Analysis: H.W. and Y.H.;;  
972 Data Curation: H.W., Yan Y. and J.H.;;  
973 Visualization: H.W., Yan Y., Y.H. and S.H.;;  
974 Funding Acquisition: Yan Y., H.W. and S.L.;;  
975 Project Administration: Yan Y.;;  
976 Supervision: Yan Y.;;  
977 Writing – Original Draft: Yan Y. and H.W.;;  
978 Writing – Review & Editing: Yan Y., H.W., Y.H., P.Z., S.H., S.L., and J.H.

979

980 **Competing interests**

981 Authors declare that they have no competing interests.

982

983

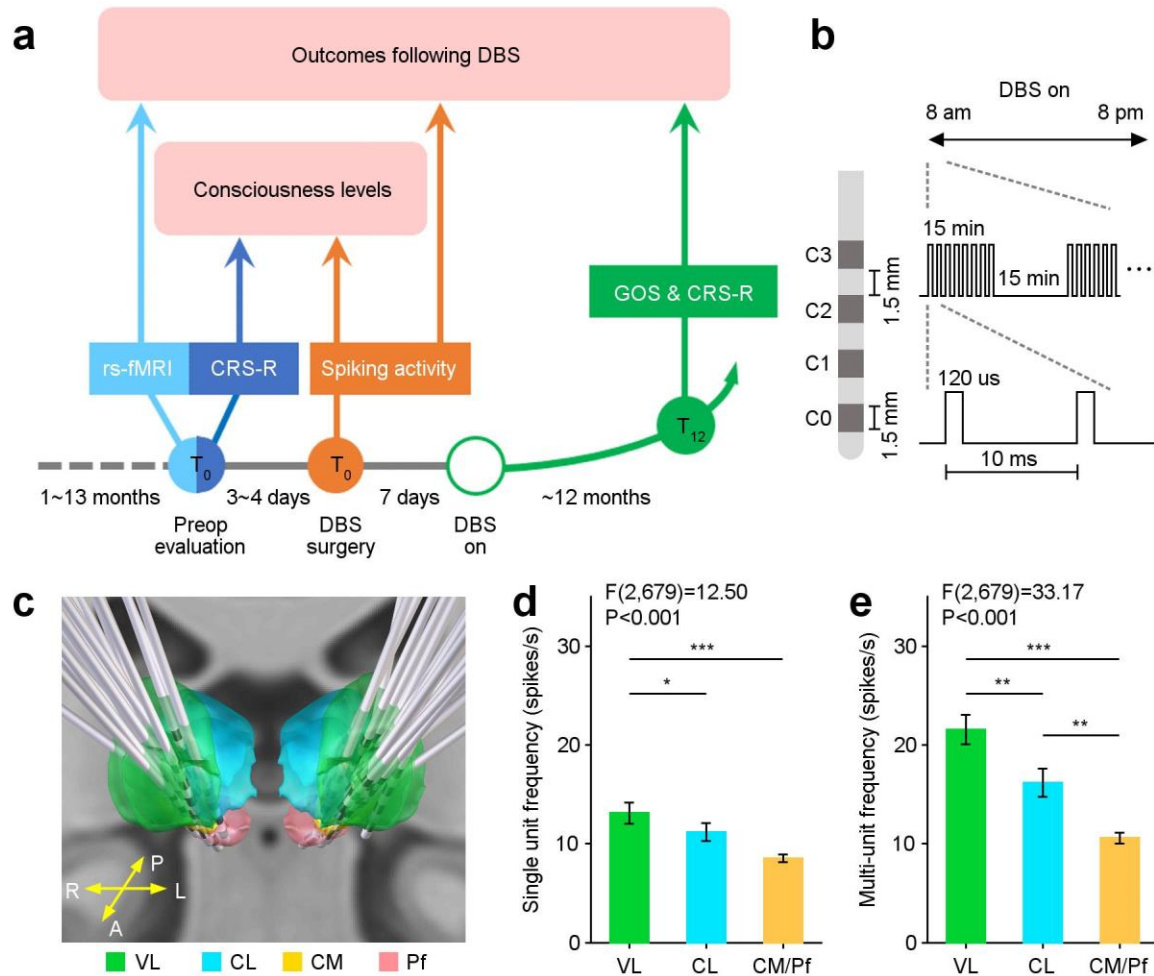

984

985 **Extended Data Fig. 1 Timeline illustrating the procedure throughout different phases of the**  
 986 **study.**

987 **a**, For each patient, CRS-R scores and rs-fMRI were acquired three to four days prior to surgery.  
 988 Thalamic activity was recorded during DBS surgery. These data were collected around the time of  
 989 the operation, or  $T_0$ . After seven days of recuperation, DBS was applied. The GOS were utilized  
 990 to assess the recovery outcomes within 12 months (referred to as  $T_{12}$ ). The follow-up CRS-R scores  
 991 were also assessed to monitor the consciousness states following DBS. In the study, we  
 992 investigated the correlations between neuronal signatures and preoperative consciousness states  
 993 using spiking activity. By analyzing spiking activities, rs-fMRI and GOS scores, we also evaluated  
 994 associations between neuronal signatures, brain connections and recovery outcomes following  
 995 DBS. **b**, The DBS parameters applied to DoC patients. **c**, Reconstructed trajectories of DBS leads  
 996 for the 29 patients. **d**, **e**, The single-unit frequency and the multi-unit frequency in the three  
 997 thalamic nuclei according to reconstructed trajectories. The thalamic neuronal firing rates  
 998 decreased upon the introduction of microelectrodes through the VL, CL to CM/Pf. Two-tailed  $P$

999 values for multiple comparisons analysis following ANOVA were corrected using the Tukey-  
1000 Kramer method. \*,  $P < 0.05$ ; \*\*,  $P < 0.01$ ; \*\*\*,  $P < 0.001$ . Error bars:  $\pm$ SEM.  
1001



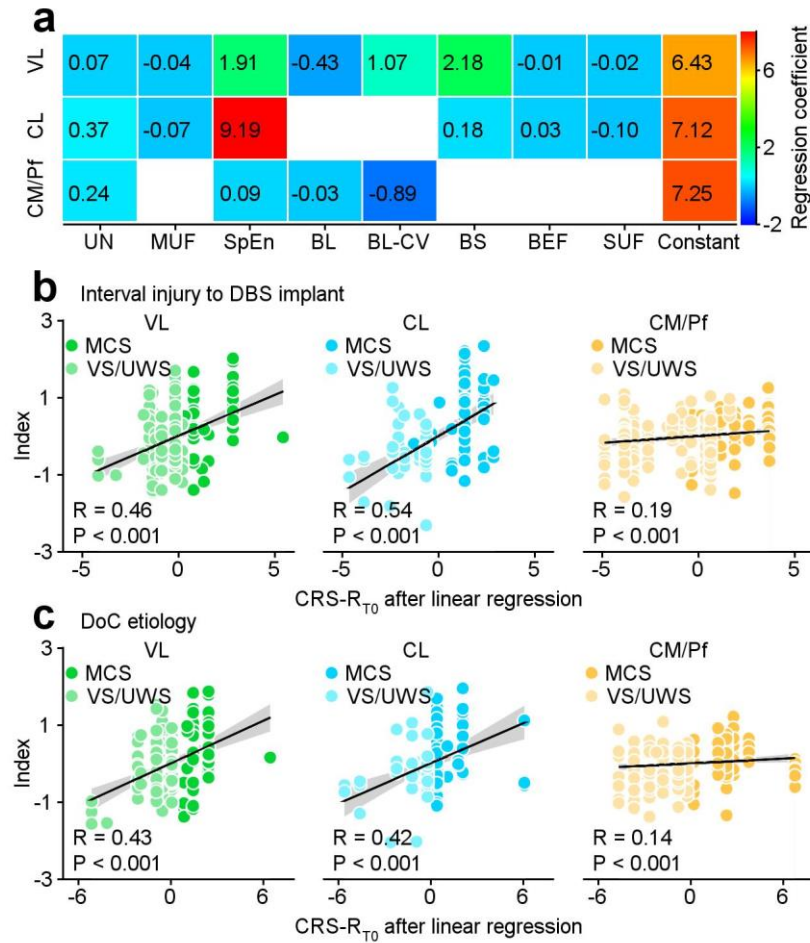

1002  
1003  
1004  
1005  
1006  
1007  
1008  
1009  
1010  
1011  
1012

**Extended Data Fig. 2 The neuronal index, as defined by PLS regression coefficients, and its relationships with interval injury and etiology.**

**a**, The neuronal index was determined based on the obtained PLS regression coefficients. The matrix represents the values of the constant and regression coefficients for three thalamic nuclei.  
**b, c**, A linear regression was employed to eliminate the effects of the interval injury to DBS implant (**b**), and etiology (**c**) on neuronal signatures in three thalamic nuclei for all 29 patients. Subsequently, the neuronal indices were re-computed after the linear regression and calculated the Pearson Correlation Coefficient. Linearly fitted lines (black) and its 95% confidence interval (gray) were shown.

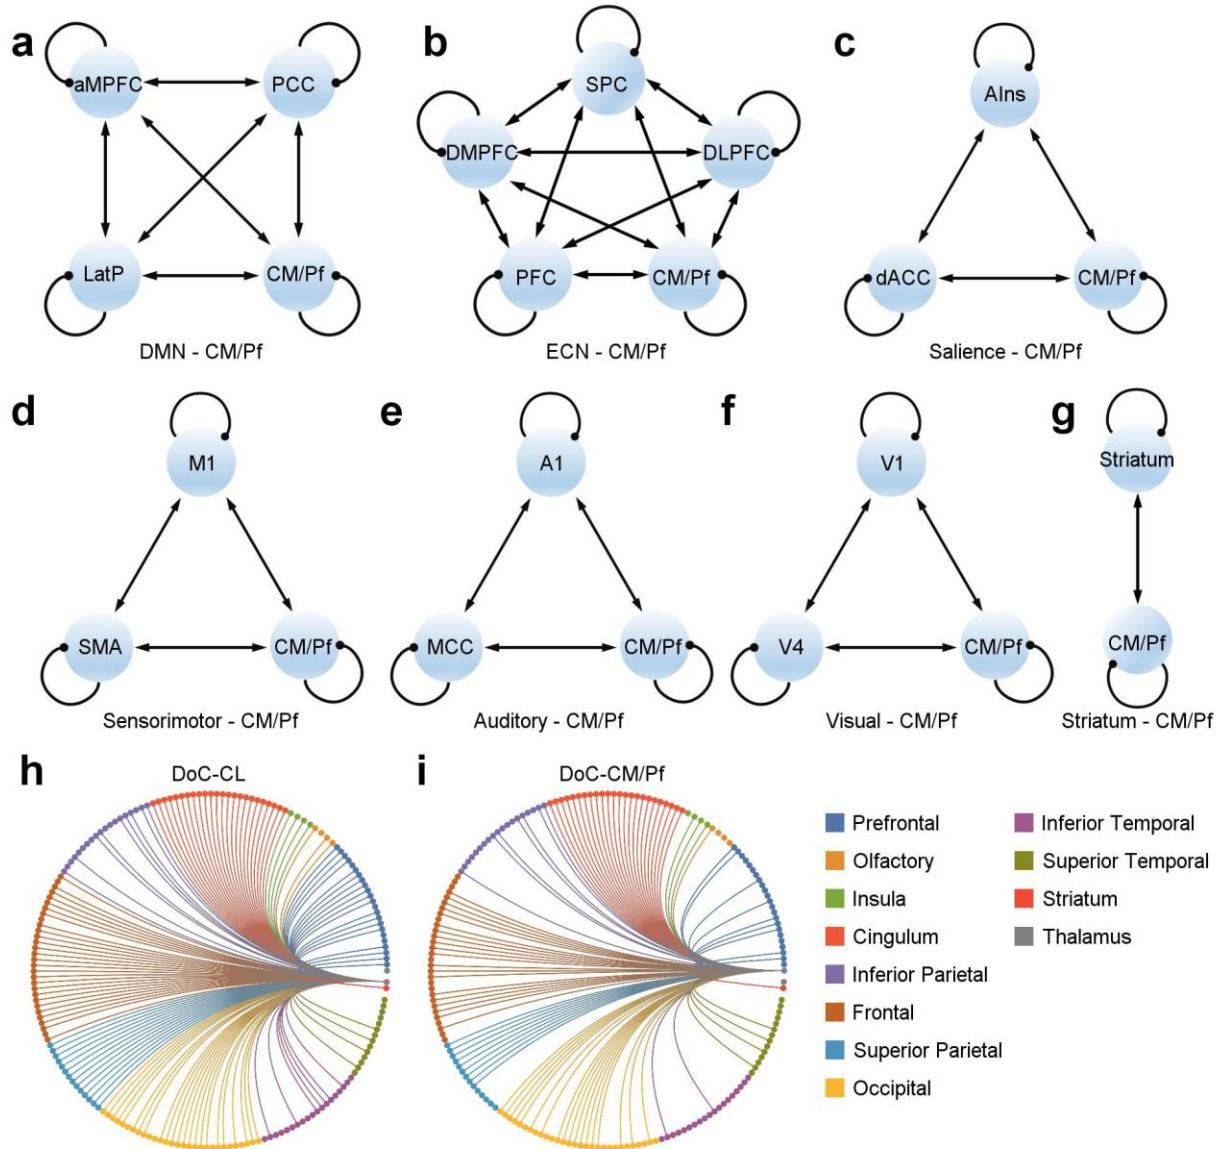

1013  
1014  
1015  
1016  
1017  
1018  
1019  
1020  
1021  
1022

**Extended Data Fig. 3 Quantifying effective connectivity of thalamocortical and thalamostriatal connections by utilizing DCM models.**

**a-f**, Six thalamocortical DCM models featured CM/Pf and the brain regions in a given network (**a**: default mode network; **b**: executive control network; **c**: salience network; **d**: sensorimotor network; **e**: auditory network; **f**: visual network). The effective connectivity (arrows) includes the reciprocal connections between these brain regions, and their self-connections within each region. **g**, The DCM model for the thalamostriatal connection involving the CM/Pf and striatum. **h, i**, The structural connectome of the CL (**h**) and the CM/Pf (**i**) in DoC patients.

1023

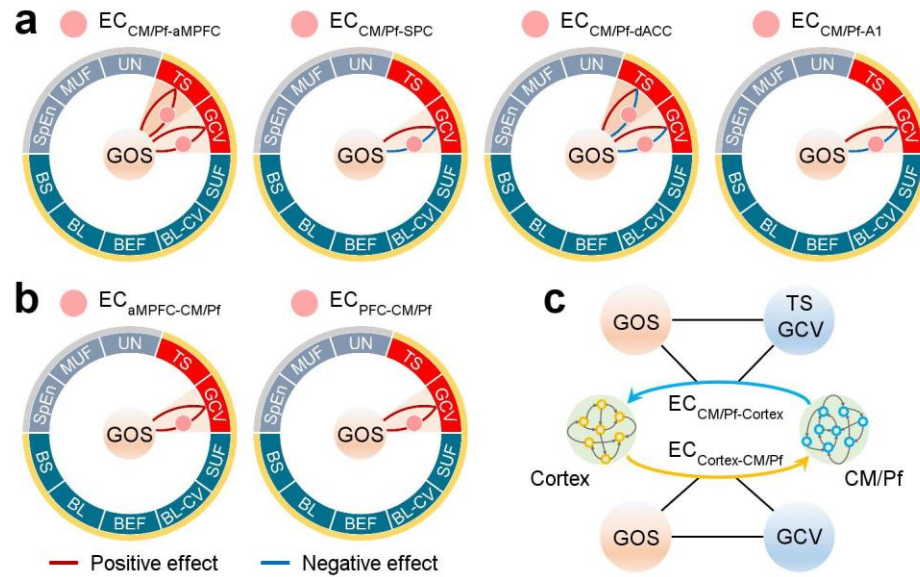

1024

1025 **Extended Data Fig. 4 Bidirectional effective connections between CM/Pf and cortical areas**  
 1026 **formed “logic loops” with neuronal signatures and GOS scores.**

1027 **a**, Logic loops involved four ECs from the CM/Pf to the cortex. These four cortical areas included  
 1028 anterior medial prefrontal cortex (aMPFC), superior parietal cortex (SPC), dorsal anterior  
 1029 cingulate cortex (dACC), and primary auditory cortex (A1). **b**, Logic loops involved two ECs from  
 1030 the cortex to the CM/Pf, with the two cortical areas, the aMPFC and the anterior prefrontal cortex  
 1031 (PFC). **c**, Summary of logic loops concerning bidirectional ECs, TS and GCV, and GOS scores in  
 1032 (**a**) and (**b**). The tonic firing in the CM/Pf is specifically associated to the unidirectional  
 1033 connections from the CM/Pf to the cortex (blue arrow), rather than the connections in the opposite  
 1034 direction (yellow arrow).

1035

1036

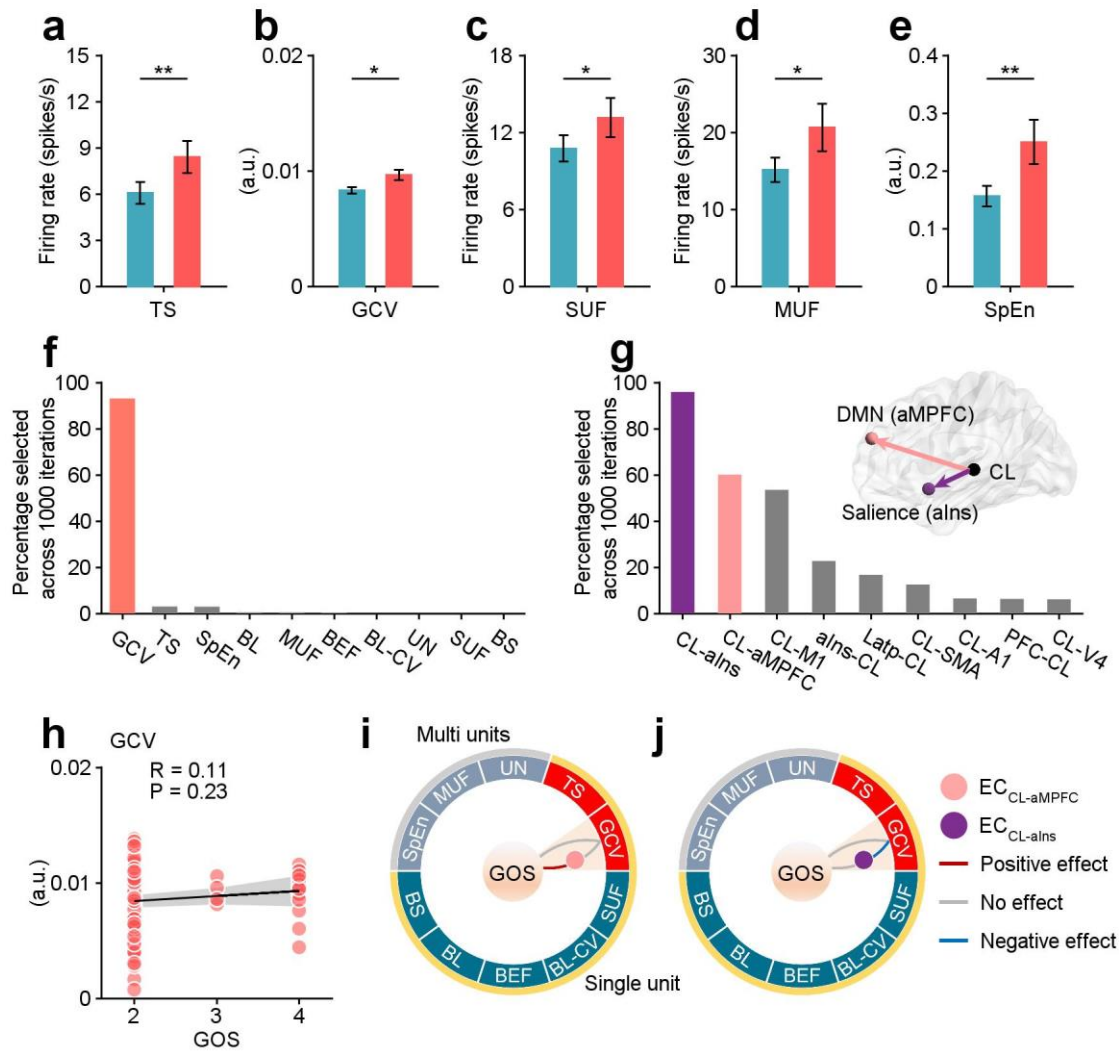

1037

1038

**Extended Data Fig. 5 The relationships among neuronal signatures in the CL, thalamocortical connections and recovery outcomes.**

1039

1040

1041

1042

1043

1044

1045

1046

1047

1048

1049

1050

**a-e**, Neuronal signatures in the CL showed differences between CR (23 recording sites) and CNR (99 recording sites) groups (**a**: tonic spikes; **b**: geometric coefficient of variation; **c**: single-unit frequency; **d**: multi-unit frequency; **e**: sample entropy). \*,  $P < 0.05$ ; \*\*,  $P < 0.01$ ; Mann-Whitney-Wilcoxon test. error bars:  $\pm$  SEM. **f**, The feature selection of neuronal signatures in the CL to discriminate the CR and CNR groups, following a liner regression analysis on the impact of different states of consciousness. **g**, The feature selection of ECs between the CL and cortical areas, as well as the striatum to discriminate the CR and CNR groups. The  $EC_{CL-aMPFC}$  and  $EC_{CL-aIns}$  were selected based on F scores of ANOVA test. **h**, The Pearson correlation between GCV and GOS scores with  $P = 0.23$ . Linearly fitted line (black) and its 95% confidence interval (gray shading) were shown. **i**, **j**, The GCV in the CL did not show a significant relationship with either GOS scores or ECs. Therefore, the logic loops are absent for both  $EC_{CL-aMPFC}$  (**i**) and  $EC_{CL-aIns}$  (**j**).

**Extended Data Table 1. Patient demographic data, etiology, clinical scores and outcome measures.**

| Patient Number | Clinical diagnosis | Gender | Age ranges (years) | Interval since injury (months) | Etiology | CRS-R <sub>T0</sub> Total score (subscores) | Outcome CRS-R <sub>T12</sub> (subscores) | Outcome (GOS) |
|----------------|--------------------|--------|--------------------|--------------------------------|----------|---------------------------------------------|------------------------------------------|---------------|
| 01             | VS/UWS             | M      | 46-50              | 5                              | Stroke   | 6<br>(102102)                               | 5<br>(002102)                            | 2             |
| 02             | VS/UWS             | M      | 66-70              | 4                              | Stroke   | 2<br>(002000)                               | 4<br>(102100)                            | 2             |
| 03             | VS/UWS             | M      | 41-45              | 4.5                            | Anoxia   | 8<br>(112202)                               | 8<br>(112202)                            | 2             |
| 04             | VS/UWS             | F      | 41-45              | 1                              | Anoxia   | 7<br>(112102)                               | 7<br>(112102)                            | 2             |
| 05             | VS/UWS             | F      | 51-55              | 3                              | Trauma   | 7<br>(112102)                               | 7<br>(112102)                            | 2             |
| 06             | VS/UWS             | F      | 61-65              | 3                              | Anoxia   | 6<br>(111102)                               | 6<br>(111102)                            | 2             |
| 07             | VS/UWS             | F      | 56-60              | 4                              | Anoxia   | 6<br>(102102)                               | 8<br>(122102)                            | 2             |
| 08             | VS/UWS             | M      | 56-60              | 3.5                            | Stroke   | 4<br>(012001)                               | 11<br>(332102)                           | 3             |
| 09             | VS/UWS             | M      | 56-60              | 4                              | Anoxia   | 5<br>(002102)                               | 6<br>(102102)                            | 2             |
| 10             | VS/UWS             | M      | 46-50              | 1.5                            | Anoxia   | 6<br>(102102)                               | 9<br>(213102)                            | 2             |
| 11             | VS/UWS             | F      | 61-65              | 1                              | Anoxia   | 5<br>(102101)                               | 7<br>(112102)                            | 2             |
| 12             | VS/UWS             | M      | 36-40              | 3.5                            | Trauma   | 7<br>(112102)                               | 12<br>(333102)                           | 3             |
| 13             | VS/UWS             | M      | 26-30              | 3.5                            | Trauma   | 5<br>(102101)                               | 9<br>(213102)                            | 2             |
| 14             | VS/UWS             | F      | 41-45              | 3                              | Anoxia   | 7<br>(112102)                               | 12<br>(233202)                           | 2             |
| 15             | VS/UWS             | M      | 56-60              | 7                              | Anoxia   | 7<br>(112102)                               | 8<br>(122102)                            | 2             |
| 16             | VS/UWS             | F      | 61-65              | 3                              | Stroke   | 3<br>(002100)                               | 4<br>(102100)                            | 2             |
| 17             | VS/UWS             | M      | 36-40              | 6                              | Stroke   | 4<br>(001102)                               | 4<br>(001102)                            | 2             |
| 18             | MCS                | F      | 31-35              | 7                              | Anoxia   | 9                                           | 6                                        | 2             |



|     |     |   |       |     |        |                |                |   |
|-----|-----|---|-------|-----|--------|----------------|----------------|---|
|     |     |   |       |     |        | (222102)       | (211002)       |   |
| 19  | MCS | M | 51-55 | 6.5 | Stroke | 9<br>(132102)  | 9<br>(132102)  | 2 |
| 20  | MCS | F | 56-60 | 6   | Anoxia | 8<br>(032102)  | 8<br>(032102)  | 2 |
| 21  | MCS | F | 11-15 | 7   | Anoxia | 8<br>(113102)  | 14<br>(333122) | 3 |
| 22  | MCS | F | 21-25 | 13  | Anoxia | 8<br>(113102)  | 21<br>(455313) | 3 |
| 23  | MCS | F | 56-60 | 3   | Stroke | 9<br>(132102)  | 8<br>(032102)  | 2 |
| 24  | MCS | M | 26-60 | 9   | Trauma | 9<br>(132102)  | 23<br>(456323) | 5 |
| 25  | MCS | M | 26-30 | 3   | Trauma | 10<br>(232102) | 23<br>(456323) | 4 |
| 26* | MCS | M | 31-35 | 4.5 | Stroke | 9<br>(132102)  | 19<br>(455113) | 4 |
| 27  | MCS | M | 46-50 | 11  | Trauma | 14<br>(245102) | 20<br>(445322) | 3 |
| 28  | MCS | M | 31-35 | 6   | Trauma | 9<br>(132102)  | 19<br>(446113) | 3 |
| 29  | MCS | M | 46-50 | 12  | Trauma | 11<br>(232202) | 15<br>(452202) | 3 |

\* DBS lead trajectories are shown in Figure 1.

VS/UWS, vegetative state/unresponsive wakefulness syndrome; MCS, minimally conscious state; F, female; M, male; CRS-R, Coma Recovery Scale-Revised total scores and subscale scores (auditory, visual, motor, oromotor/verbal, communication and arousal); GOS, Glasgow Outcome Scale.

**Extended Data Table 2. Acquisition parameters for patients with resting state functional MRI (rs-fMRI) and diffusion MRI data**

| No. | MRI Scanner        | rs-fMRI |         |                |           |         |        |                               |         | Diffusion MRI |         |                |                               |            |           |           |        |                               |
|-----|--------------------|---------|---------|----------------|-----------|---------|--------|-------------------------------|---------|---------------|---------|----------------|-------------------------------|------------|-----------|-----------|--------|-------------------------------|
|     |                    | TR (ms) | TE (ms) | Flip angle (°) | FOV (mm)  | Matrix  | Slices | Voxel size (mm <sup>3</sup> ) | Volumes | TR (ms)       | TE (ms) | Flip angle (°) | b-values (s/mm <sup>2</sup> ) | Directions | FOV (mm)  | Matrix    | Slices | Voxel size (mm <sup>3</sup> ) |
| 01  | GE signa HDxt      |         |         |                |           |         |        |                               |         | 8000          | 87.4    | 90             | 1000                          | 15         | 240 × 240 | 256 × 256 | 30     | 0.94 × 0.94 × 5               |
| 03  | GE signa HDxt      |         |         |                |           |         |        |                               |         | 17000         | 86      | 90             | 1000                          | 32         | 256 × 256 | 256 × 256 | 66     | 1 × 1 × 2                     |
| 04  | GE discovery MR750 | 2000    | 30      | 90             | 240 × 240 | 64 × 64 | 39     | 3.75 × 3.75 × 4               | 210     | 9000          | 80.8    | 90             | 1000                          | 32         | 256 × 256 | 128 × 128 | 75     | 2 × 2 × 2                     |
| 05  | GE discovery MR750 | 2000    | 30      | 90             | 240 × 240 | 64 × 64 | 39     | 3.75 × 3.75 × 4               | 210     | 9000          | 80.8    | 90             | 1000                          | 32         | 256 × 256 | 128 × 128 | 75     | 2 × 2 × 2                     |
| 07  | GE discovery MR750 | 2000    | 30      | 90             | 240 × 240 | 64 × 64 | 39     | 3.75 × 3.75 × 4               | 210     | 9000          | 80.8    | 90             | 1000                          | 64         | 256 × 256 | 128 × 128 | 75     | 2 × 2 × 2                     |
| 08# | GE signa HDxt      | 2000    | 30      | 90             | 210 × 210 | 64 × 64 | 32     | 3.28 × 3.28 × 4               | 210     | 17000         | 85.4    | 90             | 1000                          | 32         | 256 × 256 | 256 × 256 | 66     | 1 × 1 × 2                     |
| 09  | GE discovery MR750 |         |         |                |           |         |        |                               |         | 9000          | 81.4    | 90             | 1000                          | 64         | 256 × 256 | 256 × 256 | 75     | 1 × 1 × 2                     |
| 10  | GE discovery MR750 | 2000    | 30      | 90             | 240 × 240 | 64 × 64 | 39     | 3.75 × 3.75 × 4               | 210     | 9000          | 81      | 90             | 1000                          | 64         | 256 × 256 | 256 × 256 | 75     | 1 × 1 × 2                     |
| 11  | GE signa HDxt      | 2000    | 30      | 90             | 192 × 192 | 64 × 64 | 32     | 3 × 3 × 4                     | 210     | 17000         | 86      | 90             | 1000                          | 32         | 256 × 256 | 256 × 256 | 66     | 1 × 1 × 2                     |
| 12  | GE signa HDxt      | 2000    | 30      | 90             | 210 × 210 | 64 × 64 | 32     | 3.28 × 3.28 × 4               | 210     | 17000         | 85.4    | 90             | 1000                          | 32         | 256 × 256 | 256 × 256 | 66     | 1 × 1 × 2                     |
| 13  | GE signa HDxt      | 2000    | 30      | 90             | 220 × 220 | 64 × 64 | 32     | 3.44 × 3.44 × 4               | 210     | 17000         | 85.5    | 90             | 1000                          | 32         | 256 × 256 | 256 × 256 | 66     | 1 × 1 × 2                     |
| 14  | GE signa HDxt      | 2000    | 30      | 90             | 220 × 220 | 64 × 64 | 32     | 3.44 × 3.44 × 4               | 210     | 17000         | 85.4    | 90             | 1000                          | 32         | 256 × 256 | 256 × 256 | 66     | 1 × 1 × 2                     |
| 15  | SIEMENS Verio      | 2000    | 30      | 90             | 220 × 220 | 64 × 64 | 32     | 3.44 × 3.45                   | 210     |               |         |                |                               |            |           |           |        |                               |
| 16  | GE signa HDxt      | 2000    | 30      | 90             | 192 × 192 | 64 × 64 | 32     | 3 × 3 × 4                     | 210     | 17000         | 85.4    | 90             | 1000                          | 32         | 256 × 256 | 256 × 256 | 66     | 1 × 1 × 2                     |
| 17  | GE signa HDxt      | 2000    | 30      | 90             | 220 × 220 | 64 × 64 | 32     | 3.44 × 3.44 × 4               | 210     | 17000         | 85.4    | 90             | 1000                          | 32         | 256 × 256 | 256 × 256 | 66     | 1 × 1 × 2                     |

|    |                       |      |    |    |              |            |    |                      |     |       |      |    |      |    |              |              |    |           |
|----|-----------------------|------|----|----|--------------|------------|----|----------------------|-----|-------|------|----|------|----|--------------|--------------|----|-----------|
| 18 | GE signa<br>HDxt      |      |    |    |              |            |    |                      |     | 17000 | 85.5 | 90 | 1000 | 32 | 256 ×<br>256 | 256 ×<br>256 | 66 | 1 × 1 × 2 |
| 19 | GE signa<br>HDxt      | 2000 | 30 | 90 | 220 ×<br>220 | 64 ×<br>64 | 32 | 3.44 ×<br>3.44 × 4   | 210 | 17000 | 85.4 | 90 | 1000 | 32 | 256 ×<br>256 | 256 ×<br>256 | 66 | 1 × 1 × 2 |
| 22 | GE signa<br>HDxt      |      |    |    |              |            |    |                      |     | 17000 | 85.4 | 90 | 1000 | 32 | 256 ×<br>256 | 256 ×<br>256 | 66 | 1 × 1 × 2 |
| 23 | GE signa<br>HDxt      | 2000 | 30 | 90 | 220 ×<br>220 | 64 ×<br>64 | 32 | 3.44 ×<br>3.44 × 4   | 210 | 17000 | 85.4 | 90 | 1000 | 32 | 256 ×<br>256 | 256 ×<br>256 | 66 | 1 × 1 × 2 |
| 25 | GE signa<br>HDxt      | 2000 | 30 | 90 | 220 ×<br>220 | 64 ×<br>64 | 32 | 3.44 ×<br>3.44 × 4   | 240 | 17000 | 85.4 | 90 | 1000 | 32 | 256 ×<br>256 | 128 ×<br>128 | 66 | 2 × 2 × 2 |
| 26 | GE signa<br>HDxt      | 2000 | 30 | 90 | 192 ×<br>192 | 64 ×<br>64 | 32 | 3 × 3 × 4            | 210 | 17000 | 85.4 | 90 | 1000 | 32 | 256 ×<br>256 | 256 ×<br>256 | 66 | 1 × 1 × 2 |
| 27 | GE discovery<br>MR750 | 2000 | 30 | 90 | 240 ×<br>240 | 64 ×<br>64 | 39 | 3.75 ×<br>3.75 × 4   | 210 |       |      |    |      |    |              |              |    |           |
| 28 | GE signa<br>PET/MR    | 2000 | 30 | 72 | 220 ×<br>220 |            | 36 | 3.44 ×<br>3.44 × 3.8 | 200 |       |      |    |      |    |              |              |    |           |

TR, repetition time; TE, echo time; FOV, field of view.

# MRI data of this patient were discarded because of motion artefacts.
